# Supplementary material for: Inhibition of the proton-activated chloride channel PAC by PIP2
Source: eLife. 2023 Jan 12;12:e83935. doi: 10.7554/eLife.83935 (PMC9876566; doi:10.7554/eLife.83935)
Supplement: Figure 1—figure supplement 1—source data 1. [file elife-83935-fig1-figsupp1-data1.xlsx]

## Sheet: Figure S1 A
pH 7.3 + PIP2			pH 7.3
pH 5.01	pH 5.02		pH 5.01	pH 5.02		Table Analyzed	pH 7.3 + PIP2		Table Analyzed	pH 7.3
86.6474	162.497		92.8274	101.686
75.8526	106.351		106.918	84.6083		Column B	pH 5.02		Column E	pH 5.02
51.6971	87.6941		93.9682	117.176		vs.	vs.		vs.	vs.
45.4714	76.507		110.014	172.438		Column A	pH 5.01		Column D	pH 5.01
60.5281	50.8227		98.4487	90
87.0739	106.506		86.7273	106.105		Unpaired t test			Unpaired t test
			80.4527	83.0131		P value	0.1033		P value	0.1753
			71.707	198.265		P value summary	ns		P value summary	ns
			118.401	92.3511		Significantly different (P < 0.05)?	No		Significantly different (P < 0.05)?	No
						One- or two-tailed P value?	Two-tailed		One- or two-tailed P value?	Two-tailed
						t, df	t=1.792, df=10		t, df	t=1.418, df=16
						How big is the difference?			How big is the difference?
						Mean of column A	67.88		Mean of column D	95.5
						Mean of column B	98.4		Mean of column E	116.2
						Difference between means (B - A) ± SEM	30.52 ± 17.03		Difference between means (E - D) ± SEM	20.69 ± 14.59
						95% confidence interval	-7.420 to 68.46		95% confidence interval	-10.23 to 51.61
						R squared (eta squared)	0.2431		R squared (eta squared)	0.1117
						F test to compare variances			F test to compare variances
						F, DFn, Dfd	4.428, 5, 5		F, DFn, Dfd	7.738, 8, 8
						P value	0.1282		P value	0.009
						P value summary	ns		P value summary	**
						Significantly different (P < 0.05)?	No		Significantly different (P < 0.05)?	Yes
						Data analyzed			Data analyzed
						Sample size, column A	6		Sample size, column D	9
						Sample size, column B	6		Sample size, column E	9

## Sheet: Figure S1 B
0	93.9941
5	91.5527
10	102.539
15	112.915
20	114.746
25	119.019
30	121.46
35	120.85
40	120.239
45	121.46
50	122.07
55	121.46
60	317.383
65	823.975
70	988.77
75	998.535
80	1008.3
85	1038.82
90	1029.66
95	1017.46
100	1041.26
105	1041.26
110	1015.62
115	112.915
120	98.2666
125	107.422
130	108.032
135	102.539
140	104.37
145	105.591
150	100.098
155	101.929
160	103.76
165	103.149
170	105.591
175	105.591
180	102.539
185	104.98
190	103.149
195	107.422
200	106.201
205	110.474
210	106.812
215	105.591
220	106.812
225	108.032
230	113.525
235	112.305
240	109.253
245	109.863
250	109.253
255	113.525
260	115.967
265	221.558
270	841.675
275	935.669
280	997.314
285	955.2
290	949.097
295	932.007
300	941.162
305	946.655
310	927.124
315	905.762
320	950.928
325	905.151
330	931.396
335	929.565
340	897.827
345	872.803
350	880.737
355	910.034
360	880.127
365	872.803
370	861.816
375	881.958
380	880.127
385	873.413
390	855.713
395	907.593
400	919.189
405	850.22
410	904.541
415	900.879
420	864.258
425	844.727
430	869.751
435	881.958
440	857.544
445	874.634
450	900.269
455	852.661
460	850.83
465	855.103
470	839.233
475	870.361
480	867.31
485	872.803
490	864.868
495	844.116
500	844.116
505	837.402
510	371.094
515	119.019
520	115.356
525	145.264
530	159.302
535	171.509
540	153.809
545
550
555
560
565
570
575
580
585
590
595
600
605
610
615
620
625
630
635
640
645
650
655
660
665
670
675
680
685
690
