# Supplementary material for: Inhibition of the proton-activated chloride channel PAC by PIP2
Source: eLife. 2023 Jan 12;12:e83935. doi: 10.7554/eLife.83935 (PMC9876566; doi:10.7554/eLife.83935)
Supplement: Figure 1—source data 1. [file elife-83935-fig1-data1.xlsx]

## Sheet: Figure 1 A
0	242.31
2	223.999
4	233.154
6	220.337
8	221.558
10	214.844
12	210.571
14	208.74
16	203.857
18	206.299
20	195.923
22	269.775
24	1838.38
26	3207.4
28	3782.96
30	4064.33
32	4152.83
34	4112.55
36	4091.8
38	4022.83
40	4042.97
42	4123.53
44	4146.12
46	4088.74
48	3997.8
50	4067.38
52	4046.63
54	4033.81
56	4102.78
58	4059.45
60	4103.39
62	4065.55
64	3396.61
68	3487.55
70	3396
72	3452.76
74	3473.51
76	3474.73
78	3403.93
80	3450.93
82	3362.43
84	3412.48
86	3439.33
90	3421.02
92	3335.57
94	3379.52
96	3368.53
98	3331.3
100	3284.91
104	3199.46
106	3187.26
108	3106.69
110	3092.65
112	3115.23
114	3047.49
116	3049.32
118	2963.26
120	2955.32
122	2946.78
124	2892.46
126	2861.94
128	2886.96
130	2852.78
132	2860.72
134	2818.6
136	2802.12
138	2774.05
140	2778.93
142	2743.53
144	2724.61
146	2750.24
148	2724.61
150	2670.9
152	2642.21
154	2658.08
156	2579.35
158	2655.64
160	2576.29
162	2564.7
164	2583.01
166	2492.68
168	2550.05
170	2493.29
172	2480.47
174	2520.75
176	2468.87
178	2398.68
180	2480.47
182	2432.25
184	2409.67
186	2418.21
188	2362.67
190	2434.08
192	2382.2
194	2325.44
196	2303.47
198	2290.65
200	2259.52
202	2253.42
204	2266.85
208	2247.31
210	2203.37
212	2234.5
214	2171.02
216	2216.8
218	2192.99
220	2216.19
222	2164.92
224	2171.02
226	2210.69
228	2164.31
230	2152.71
232	2133.18
234	2126.47
236	2050.17
238	2102.05
240	2045.29
242	2080.08
244	2048.95
246	2015.38
248	2016.6
250	2037.35
252	2021.48
254	2047.12
256	2012.33
258	1943.36
260	1918.94
262	1941.53
264	1921.39
266	1894.53
268	1954.35
270	1932.37
272	1928.1
274	1908.57
276	1933.59
278	1923.22
280	1857.91
282	1874.39
284	1845.09
286	1848.14
288	1803.59
290	1819.46
292	1824.95
294	1815.19
296	1791.99
298	1730.96
300	1791.38
302	1746.22
304	1799.32
306	1727.9
308	1764.53
310	1731.57
312	1703.49
314	1677.86
316	1641.85
318	1641.85
320	1638.18
322	1626.59
324	1613.16
326	1604
328	1620.48
330	1607.06
332	1536.87
334	1591.19
336	1602.78
338	1550.29
340	1538.7
342	1486.21
344	1441.65
346	1451.42
348	1408.08
350	1411.13
352	1378.78
354	1374.51
356	1406.25
358	1313.48
360	1301.88
362	1328.12
364	1254.88
366	1242.07
368	1237.18
370	1247.56
372	1218.26
374	1212.16
376	1193.85
378	1215.21
380	1226.81
382	1179.2
384	1188.35
386	1196.9
388	1164.55
390	1211.55
392	1182.25
394	1222.53
396	1211.55
398	1181.03
400	1199.95
402	1198.73
404	1174.93
406	1182.86
408	1186.52
410	1179.81
412	1174.32
414	1163.33
416	1123.05
418	1181.64
420	1142.58
422	1162.72
424	1127.32
426	1161.5
428	1174.32
430	1171.88
432	1110.23
434	1148.07
436	1160.28
438	1184.69
440	1125.49
442	1326.29
444	1450.81
446	1450.81
448	1491.7
450	1545.41
452	1585.69
454	1600.34
456	1640.02
458	1706.54
460	1759.64
462	1746.83
464	1865.85
466	1928.71
468	1932.98
470	2008.06
472	2087.4
474	2098.39
476	2143.55
478	2180.79
480	2213.14
482	2301.03
484	2319.34
486	2371.22
488	2393.8
490	2420.04
492	2516.48
494	2493.29
496	2546.39
498	2639.77
500	2655.64
502	2609.86
504	2672.12
506	2677
508	2714.84
510	2659.3
512	2718.51
514	2750.85
516	2781.37
518	2769.78
520	2824.1
522	2731.93
524	2855.22
526	2826.54
528	2883.91
530	2874.15
532	2893.07
534	2889.4
536	2954.71
538	2975.46
540	3015.14
542	3023.68
544	2974.24
546	2985.84
548	3010.86
550	3028.56
552	3009.03
554	3074.34
556	3013.31
558	3002.93
560	3128.66
562	3136.6
564	3110.35
566	3120.12
568	3154.91
570	3146.36
572	3161.62
574	3169.56
576	3154.91
578	3110.35
580	3136.6
582	3166.5
584	3162.23
586	3169.56
588	3169.56
590	3160.4
592	3161.62
594	3236.69
596	3220.22
598	3184.2
600	3256.84
602	3263.55
604	3251.95
606	3309.33
608	3319.7
610	3312.38
612	3229.37
614	3230.59
616	3229.98
618	3207.4
620	3245.24
622	3266.6
624	3291.02
626	3242.8
628	3287.96
630	3283.69
632	3278.2
634	3282.47
636	3287.96
638	3294.07
640	3302.61
642	3327.64
644	3264.16
646	3286.13
648	3303.83
650	3262.33
652	3358.76
654	3385.62
656	3342.28
658	3338.62
660	3306.89
662	3285.52
664	3327.03
666	3334.96
668	3407.59
670	3341.68
672	3271.48
674	3344.12
676	3290.41
678	3337.4
680	3306.89
682	3342.28
684	3311.16
686	3327.64
688	3330.69
690	3308.11
692	3327.03
694	3272.09
696	3305.05
698	3283.69
700	3285.52
702	3320.31
704	270.996
706	208.74

## Sheet: Figure 1 B
pH 5.0	pH 5.0 + PIP2		Table Analyzed	pA/pF
133.586	33.7421
108.096	33.1204		Column B	pH 5.0 + PIP2
133.81	39.8432		vs.	vs.
162.647	49.5634		Column A	pH 5.0
130.028	44.9031
86.5782	16.7334		Paired t test
63.8156	12.1805		P value	<0.0001
50.6273	13.8514		P value summary	****
			Significantly different (P < 0.05)?	Yes
			One- or two-tailed P value?	Two-tailed
			t, df	t=8.735, df=7
			Number of pairs	8
			How big is the difference?
			Mean of differences (B - A)	-78.16
			SD of differences	25.31
			SEM of differences	8.948
			95% confidence interval	-99.31 to -57.00
			R squared (partial eta squared)	0.916
			How effective was the pairing?
			Correlation coefficient (r)	0.9506
			P value (one tailed)	0.0001
			P value summary	***
			Was the pairing significantly effective?	Yes

## Sheet: Figure 1 C
mV	pH 5.0	pH 5.0 + 10uM PIP2
-99.9	-194.702	-114.746
-99.8	-187.988	-112.305
-99.7	-185.547	-110.474
-99.6	-181.274	-106.201
-99.5	-186.157	-104.98
-99.4	-186.768	-104.37
-99.3	-183.105	-101.318
-99.2	-181.274	-104.98
-99.1	-183.105	-106.201
-99	-179.443	-106.812
-98.9	-181.885	-106.201
-98.8	-179.443	-95.8252
-98.7	-181.885	-98.2666
-98.6	-184.326	-98.2666
-98.5	-184.937	-96.4355
-98.4	-184.937	-101.929
-98.3	-187.988	-103.149
-98.2	-189.209	-98.877
-98.1	-187.378	-100.708
-98	-185.547	-103.149
-97.9	-189.819	-99.4873
-97.8	-186.768	-93.9941
-97.7	-189.819	-99.4873
-97.6	-190.43	-97.0459
-97.5	-190.43	-99.4873
-97.4	-195.923	-99.4873
-97.3	-194.092	-95.8252
-97.2	-191.65	-96.4355
-97.1	-186.768	-94.6045
-97	-185.547	-92.7734
-96.9	-178.223	-93.3838
-96.8	-178.833	-95.8252
-96.7	-178.833	-95.2148
-96.6	-177.612	-100.098
-96.5	-175.171	-103.149
-96.4	-179.443	-98.877
-96.3	-178.833	-101.318
-96.2	-179.443	-99.4873
-96.1	-181.274	-100.708
-96	-179.443	-93.3838
-95.9	-177.002	-95.8252
-95.8	-176.392	-102.539
-95.7	-172.729	-98.877
-95.6	-181.274	-97.6563
-95.5	-181.885	-101.929
-95.4	-185.547	-95.8252
-95.3	-181.885	-91.5527
-95.2	-183.105	-93.9941
-95.1	-180.664	-89.7217
-95	-179.443	-89.1113
-94.9	-181.274	-93.9941
-94.8	-183.105	-97.6563
-94.7	-176.392	-96.4355
-94.6	-170.898	-95.2148
-94.5	-173.34	-97.6563
-94.4	-170.288	-97.0459
-94.3	-175.171	-95.2148
-94.2	-176.392	-90.9424
-94.1	-177.612	-93.3838
-94	-172.729	-89.7217
-93.9	-173.34	-92.1631
-93.8	-171.509	-93.9941
-93.7	-175.171	-94.6045
-93.6	-177.002	-100.708
-93.5	-179.443	-100.098
-93.4	-180.054	-95.2148
-93.3	-176.392	-93.9941
-93.2	-179.443	-95.8252
-93.1	-179.443	-98.2666
-93	-178.833	-93.9941
-92.9	-177.002	-90.332
-92.8	-170.288	-89.1113
-92.7	-172.729	-93.3838
-92.6	-170.898	-89.1113
-92.5	-164.185	-95.2148
-92.4	-163.574	-91.5527
-92.3	-171.509	-93.3838
-92.2	-174.561	-93.3838
-92.1	-178.223	-93.9941
-92	-176.392	-94.6045
-91.9	-173.34	-93.9941
-91.8	-170.288	-89.7217
-91.7	-166.626	-92.7734
-91.6	-171.509	-97.0459
-91.5	-169.067	-92.7734
-91.4	-172.729	-89.7217
-91.3	-168.457	-90.9424
-91.2	-170.898	-89.1113
-91.1	-167.236	-85.4492
-91	-166.016	-87.2803
-90.9	-163.574	-83.0078
-90.8	-161.133	-83.0078
-90.7	-163.574	-90.9424
-90.6	-167.236	-87.8906
-90.5	-165.405	-93.3838
-90.4	-168.457	-90.9424
-90.3	-169.678	-92.7734
-90.2	-164.795	-93.3838
-90.1	-167.236	-93.9941
-90	-167.847	-84.8389
-89.9	-166.626	-89.7217
-89.8	-169.067	-92.1631
-89.7	-167.236	-97.6563
-89.6	-171.509	-93.3838
-89.5	-169.067	-95.2148
-89.4	-170.288	-86.6699
-89.3	-171.509	-91.5527
-89.2	-169.678	-90.332
-89.1	-172.729	-90.9424
-89	-171.509	-90.332
-88.9	-172.729	-95.8252
-88.8	-175.171	-95.8252
-88.7	-172.729	-95.2148
-88.6	-173.95	-89.1113
-88.5	-174.561	-82.3975
-88.4	-177.612	-88.501
-88.3	-173.95	-86.0596
-88.2	-163.574	-87.8906
-88.1	-169.678	-90.9424
-88	-173.34	-87.8906
-87.9	-170.288	-84.8389
-87.8	-167.847	-85.4492
-87.7	-170.898	-87.8906
-87.6	-173.95	-87.8906
-87.5	-172.119	-91.5527
-87.4	-178.833	-95.2148
-87.3	-173.95	-93.9941
-87.2	-172.119	-89.1113
-87.1	-169.678	-89.1113
-87	-169.067	-84.2285
-86.9	-164.185	-83.6182
-86.8	-169.067	-89.1113
-86.7	-169.067	-92.1631
-86.6	-173.34	-90.9424
-86.5	-166.016	-84.8389
-86.4	-166.626	-79.3457
-86.3	-164.795	-88.501
-86.2	-164.185	-83.0078
-86.1	-167.847	-84.8389
-86	-163.574	-84.8389
-85.9	-166.016	-81.1768
-85.8	-164.185	-87.2803
-85.7	-161.133	-86.6699
-85.6	-159.912	-81.7871
-85.5	-157.471	-83.0078
-85.4	-151.978	-76.9043
-85.3	-157.471	-83.0078
-85.2	-156.86	-78.125
-85.1	-162.964	-83.0078
-85	-164.185	-84.2285
-84.9	-166.626	-83.0078
-84.8	-164.795	-90.9424
-84.7	-162.354	-83.6182
-84.6	-160.522	-82.3975
-84.5	-161.743	-83.6182
-84.4	-164.185	-82.3975
-84.3	-156.86	-84.8389
-84.2	-159.302	-83.0078
-84.1	-159.912	-82.3975
-84	-161.133	-86.0596
-83.9	-160.522	-83.6182
-83.8	-160.522	-81.7871
-83.7	-154.419	-77.5146
-83.6	-159.302	-79.3457
-83.5	-156.86	-88.501
-83.4	-158.081	-80.5664
-83.3	-155.64	-81.1768
-83.2	-156.25	-81.1768
-83.1	-155.029	-80.5664
-83	-155.64	-81.7871
-82.9	-151.367	-84.8389
-82.8	-154.419	-86.6699
-82.7	-153.809	-83.0078
-82.6	-155.64	-84.2285
-82.5	-157.471	-83.6182
-82.4	-159.912	-86.6699
-82.3	-159.302	-78.7354
-82.2	-157.471	-80.5664
-82.1	-149.536	-79.9561
-82	-153.809	-83.6182
-81.9	-154.419	-83.6182
-81.8	-153.809	-79.9561
-81.7	-158.081	-78.125
-81.6	-154.419	-80.5664
-81.5	-163.574	-78.125
-81.4	-158.691	-81.1768
-81.3	-157.471	-85.4492
-81.2	-156.86	-85.4492
-81.1	-155.029	-83.0078
-81	-153.198	-81.7871
-80.9	-158.081	-79.3457
-80.8	-159.302	-76.9043
-80.7	-157.471	-83.6182
-80.6	-156.25	-86.6699
-80.5	-166.626	-81.1768
-80.4	-159.302	-76.9043
-80.3	-159.912	-72.0215
-80.2	-166.016	-75.6836
-80.1	-163.574	-75.0732
-80	-159.302	-76.2939
-79.9	-155.029	-76.2939
-79.8	-157.471	-78.125
-79.7	-156.86	-77.5146
-79.6	-158.691	-76.2939
-79.5	-156.86	-80.5664
-79.4	-155.029	-79.3457
-79.3	-151.367	-77.5146
-79.2	-155.029	-70.8008
-79.1	-148.926	-72.6318
-79	-153.809	-79.3457
-78.9	-156.25	-79.3457
-78.8	-153.198	-77.5146
-78.7	-151.978	-74.4629
-78.6	-155.029	-70.8008
-78.5	-155.029	-73.8525
-78.4	-156.86	-73.2422
-78.3	-157.471	-75.0732
-78.2	-156.25	-73.8525
-78.1	-149.536	-75.6836
-78	-148.315	-75.6836
-77.9	-150.757	-76.9043
-77.8	-149.536	-73.8525
-77.7	-151.978	-74.4629
-77.6	-150.146	-78.125
-77.5	-147.095	-78.125
-77.4	-143.433	-81.7871
-77.3	-142.212	-79.3457
-77.2	-142.822	-76.2939
-77.1	-142.822	-74.4629
-77	-138.55	-73.2422
-76.9	-148.315	-72.0215
-76.8	-145.264	-73.8525
-76.7	-150.146	-77.5146
-76.6	-148.926	-73.8525
-76.5	-143.433	-72.0215
-76.4	-143.433	-71.4111
-76.3	-148.926	-75.6836
-76.2	-145.874	-75.0732
-76.1	-150.757	-76.2939
-76	-153.809	-69.5801
-75.9	-147.705	-72.6318
-75.8	-147.705	-71.4111
-75.7	-137.329	-67.1387
-75.6	-137.939	-67.749
-75.5	-139.16	-68.3594
-75.4	-139.16	-72.6318
-75.3	-143.433	-71.4111
-75.2	-147.095	-70.8008
-75.1	-146.484	-68.9697
-75	-145.264	-67.1387
-74.9	-142.822	-67.749
-74.8	-139.771	-72.0215
-74.7	-143.433	-72.0215
-74.6	-142.822	-69.5801
-74.5	-151.978	-68.3594
-74.4	-147.095	-70.1904
-74.3	-146.484	-70.8008
-74.2	-155.029	-67.1387
-74.1	-148.315	-72.0215
-74	-137.329	-72.0215
-73.9	-146.484	-68.3594
-73.8	-143.433	-70.1904
-73.7	-142.822	-70.1904
-73.6	-145.264	-66.5283
-73.5	-143.433	-65.918
-73.4	-141.602	-66.5283
-73.3	-144.043	-67.749
-73.2	-142.822	-62.8662
-73.1	-142.212	-65.918
-73	-144.653	-68.3594
-72.9	-148.926	-64.0869
-72.8	-149.536	-64.6973
-72.7	-148.315	-62.2559
-72.6	-153.809	-65.3076
-72.5	-150.146	-63.4766
-72.4	-154.419	-67.749
-72.3	-151.978	-66.5283
-72.2	-153.809	-69.5801
-72.1	-152.588	-59.8145
-72	-152.588	-56.1523
-71.9	-152.588	-62.8662
-71.8	-151.367	-65.3076
-71.7	-151.367	-67.1387
-71.6	-153.198	-67.749
-71.5	-147.095	-63.4766
-71.4	-143.433	-68.9697
-71.3	-142.212	-68.3594
-71.2	-145.264	-70.1904
-71.1	-150.757	-65.918
-71	-151.978	-67.749
-70.9	-148.315	-69.5801
-70.8	-147.705	-70.8008
-70.7	-143.433	-68.9697
-70.6	-143.433	-70.1904
-70.5	-147.705	-67.749
-70.4	-144.043	-66.5283
-70.3	-140.381	-64.0869
-70.2	-144.653	-62.2559
-70.1	-147.095	-61.0352
-70	-145.874	-59.2041
-69.9	-137.329	-65.3076
-69.8	-139.16	-63.4766
-69.7	-146.484	-68.3594
-69.6	-156.25	-65.918
-69.5	-151.978	-67.1387
-69.4	-153.198	-69.5801
-69.3	-154.419	-64.6973
-69.2	-158.081	-64.0869
-69.1	-151.367	-60.4248
-69	-151.978	-64.0869
-68.9	-141.602	-62.8662
-68.8	-137.939	-61.6455
-68.7	-142.212	-64.6973
-68.6	-145.264	-61.0352
-68.5	-144.043	-59.8145
-68.4	-146.484	-58.5938
-68.3	-147.705	-59.2041
-68.2	-146.484	-63.4766
-68.1	-139.771	-65.918
-68	-150.757	-62.8662
-67.9	-148.926	-60.4248
-67.8	-153.809	-62.8662
-67.7	-145.264	-61.0352
-67.6	-143.433	-60.4248
-67.5	-148.926	-62.8662
-67.4	-150.757	-59.8145
-67.3	-148.315	-61.6455
-67.2	-144.653	-62.8662
-67.1	-148.926	-57.9834
-67	-155.029	-61.6455
-66.9	-147.095	-59.2041
-66.8	-147.095	-58.5938
-66.7	-147.095	-62.8662
-66.6	-145.264	-59.8145
-66.5	-142.822	-64.0869
-66.4	-144.043	-64.0869
-66.3	-145.874	-61.0352
-66.2	-146.484	-61.0352
-66.1	-140.381	-61.0352
-66	-138.55	-57.373
-65.9	-143.433	-57.373
-65.8	-147.705	-59.2041
-65.7	-145.874	-57.9834
-65.6	-147.095	-59.8145
-65.5	-140.381	-61.0352
-65.4	-143.433	-59.8145
-65.3	-145.874	-59.2041
-65.2	-149.536	-60.4248
-65.1	-148.926	-62.8662
-65	-150.757	-64.0869
-64.9	-144.653	-62.2559
-64.8	-142.212	-60.4248
-64.7	-144.653	-59.2041
-64.6	-142.212	-57.373
-64.5	-145.264	-59.2041
-64.4	-145.874	-60.4248
-64.3	-137.329	-58.5938
-64.2	-137.329	-56.1523
-64.1	-137.329	-61.0352
-64	-136.719	-59.2041
-63.9	-139.771	-53.1006
-63.8	-136.108	-53.7109
-63.7	-134.888	-50.6592
-63.6	-137.939	-57.9834
-63.5	-132.446	-59.2041
-63.4	-135.498	-56.1523
-63.3	-140.381	-55.542
-63.2	-138.55	-54.3213
-63.1	-134.277	-55.542
-63	-143.433	-56.7627
-62.9	-139.771	-57.9834
-62.8	-141.602	-55.542
-62.7	-141.602	-53.1006
-62.6	-141.602	-54.3213
-62.5	-140.991	-53.1006
-62.4	-137.939	-54.3213
-62.3	-142.212	-58.5938
-62.2	-140.991	-60.4248
-62.1	-145.874	-57.373
-62	-146.484	-53.1006
-61.9	-148.926	-53.7109
-61.8	-148.315	-54.9316
-61.7	-144.653	-56.1523
-61.6	-139.16	-54.9316
-61.5	-142.822	-57.373
-61.4	-140.991	-54.9316
-61.3	-139.771	-57.373
-61.2	-152.588	-57.373
-61.1	-144.043	-47.6074
-61	-137.329	-51.2695
-60.9	-145.264	-58.5938
-60.8	-141.602	-63.4766
-60.7	-145.874	-54.9316
-60.6	-148.926	-54.3213
-60.5	-154.419	-53.1006
-60.4	-147.095	-56.1523
-60.3	-147.705	-57.9834
-60.2	-148.315	-57.9834
-60.1	-148.926	-56.1523
-60	-153.809	-53.1006
-59.9	-150.146	-53.1006
-59.8	-144.043	-54.3213
-59.7	-141.602	-54.3213
-59.6	-142.212	-53.1006
-59.5	-145.874	-50.6592
-59.4	-145.874	-51.8799
-59.3	-145.264	-54.3213
-59.2	-146.484	-54.3213
-59.1	-145.264	-54.3213
-59	-149.536	-54.9316
-58.9	-151.367	-50.0488
-58.8	-147.705	-51.2695
-58.7	-148.926	-48.2178
-58.6	-150.146	-51.8799
-58.5	-154.419	-53.1006
-58.4	-151.367	-55.542
-58.3	-147.705	-52.4902
-58.2	-145.264	-48.2178
-58.1	-148.926	-48.2178
-58	-152.588	-45.166
-57.9	-154.419	-55.542
-57.8	-149.536	-51.2695
-57.7	-152.588	-54.3213
-57.6	-153.809	-47.6074
-57.5	-147.705	-54.3213
-57.4	-155.64	-51.8799
-57.3	-151.367	-53.1006
-57.2	-154.419	-51.8799
-57.1	-158.081	-56.7627
-57	-154.419	-52.4902
-56.9	-156.25	-48.2178
-56.8	-150.757	-45.166
-56.7	-148.315	-47.6074
-56.6	-148.315	-47.6074
-56.5	-145.874	-48.2178
-56.4	-151.367	-47.6074
-56.3	-144.653	-48.2178
-56.2	-148.926	-54.9316
-56.1	-145.264	-52.4902
-56	-144.653	-47.6074
-55.9	-146.484	-47.6074
-55.8	-145.264	-46.9971
-55.7	-147.705	-51.2695
-55.6	-147.705	-47.6074
-55.5	-151.978	-51.8799
-55.4	-153.809	-46.9971
-55.3	-147.095	-46.9971
-55.2	-144.653	-42.7246
-55.1	-152.588	-41.5039
-55	-151.367	-39.0625
-54.9	-149.536	-43.335
-54.8	-153.198	-47.6074
-54.7	-150.757	-37.2314
-54.6	-152.588	-40.2832
-54.5	-153.809	-49.4385
-54.4	-151.367	-52.4902
-54.3	-147.095	-51.2695
-54.2	-145.264	-49.4385
-54.1	-148.315	-46.3867
-54	-150.757	-45.166
-53.9	-148.315	-47.6074
-53.8	-147.095	-49.4385
-53.7	-147.705	-43.9453
-53.6	-148.315	-46.9971
-53.5	-156.25	-45.166
-53.4	-151.367	-40.2832
-53.3	-147.095	-43.335
-53.2	-147.095	-45.7764
-53.1	-153.198	-44.5557
-53	-149.536	-40.8936
-52.9	-148.926	-42.1143
-52.8	-155.029	-41.5039
-52.7	-155.64	-43.9453
-52.6	-144.653	-48.2178
-52.5	-144.043	-45.7764
-52.4	-144.043	-44.5557
-52.3	-145.264	-39.0625
-52.2	-144.653	-36.0107
-52.1	-142.212	-42.7246
-52	-139.771	-41.5039
-51.9	-139.16	-42.1143
-51.8	-142.822	-46.9971
-51.7	-146.484	-42.1143
-51.6	-145.874	-39.6729
-51.5	-142.822	-42.7246
-51.4	-145.264	-39.6729
-51.3	-152.588	-42.7246
-51.2	-148.315	-43.9453
-51.1	-147.095	-42.7246
-51	-149.536	-39.6729
-50.9	-144.043	-44.5557
-50.8	-144.653	-45.166
-50.7	-148.315	-44.5557
-50.6	-147.095	-43.335
-50.5	-145.874	-43.335
-50.4	-142.822	-42.7246
-50.3	-140.991	-46.9971
-50.2	-138.55	-40.2832
-50.1	-144.653	-40.2832
-50	-139.771	-38.4521
-49.9	-138.55	-39.0625
-49.8	-135.498	-36.0107
-49.7	-136.719	-32.959
-49.6	-136.719	-35.4004
-49.5	-143.433	-33.5693
-49.4	-144.653	-35.4004
-49.3	-147.095	-36.0107
-49.2	-145.874	-40.8936
-49.1	-144.653	-41.5039
-49	-147.095	-41.5039
-48.9	-142.822	-41.5039
-48.8	-147.705	-39.0625
-48.7	-147.095	-37.2314
-48.6	-146.484	-39.0625
-48.5	-144.653	-36.6211
-48.4	-140.381	-42.7246
-48.3	-147.705	-37.2314
-48.2	-148.926	-32.3486
-48.1	-148.926	-34.79
-48	-149.536	-38.4521
-47.9	-150.146	-41.5039
-47.8	-140.991	-32.959
-47.7	-140.381	-35.4004
-47.6	-145.264	-34.1797
-47.5	-145.264	-33.5693
-47.4	-146.484	-40.2832
-47.3	-147.095	-40.2832
-47.2	-144.043	-39.0625
-47.1	-143.433	-37.8418
-47	-147.095	-33.5693
-46.9	-145.264	-35.4004
-46.8	-145.874	-35.4004
-46.7	-147.095	-34.79
-46.6	-150.146	-39.0625
-46.5	-148.315	-41.5039
-46.4	-144.653	-42.1143
-46.3	-144.653	-35.4004
-46.2	-150.757	-36.0107
-46.1	-150.757	-37.2314
-46	-145.874	-36.6211
-45.9	-147.705	-36.6211
-45.8	-145.874	-39.0625
-45.7	-140.991	-41.5039
-45.6	-150.757	-34.1797
-45.5	-147.095	-31.7383
-45.4	-152.588	-34.1797
-45.3	-148.315	-31.7383
-45.2	-149.536	-32.3486
-45.1	-146.484	-30.5176
-45	-147.705	-34.79
-44.9	-141.602	-34.1797
-44.8	-148.926	-34.1797
-44.7	-145.874	-31.1279
-44.6	-144.653	-34.79
-44.5	-142.822	-29.9072
-44.4	-145.874	-29.9072
-44.3	-145.264	-31.1279
-44.2	-150.146	-35.4004
-44.1	-147.705	-31.1279
-44	-143.433	-32.3486
-43.9	-141.602	-29.9072
-43.8	-140.991	-26.2451
-43.7	-142.212	-26.8555
-43.6	-145.874	-30.5176
-43.5	-142.822	-31.1279
-43.4	-142.822	-29.2969
-43.3	-139.16	-31.7383
-43.2	-140.381	-25.0244
-43.1	-140.991	-28.0762
-43	-135.498	-22.583
-42.9	-136.108	-23.8037
-42.8	-140.991	-30.5176
-42.7	-135.498	-30.5176
-42.6	-137.329	-28.6865
-42.5	-140.381	-32.3486
-42.4	-142.212	-32.3486
-42.3	-142.822	-28.0762
-42.2	-145.874	-34.79
-42.1	-141.602	-33.5693
-42	-139.16	-31.1279
-41.9	-144.043	-26.8555
-41.8	-144.043	-32.3486
-41.7	-142.822	-37.2314
-41.6	-152.588	-35.4004
-41.5	-147.095	-29.9072
-41.4	-144.653	-27.4658
-41.3	-140.381	-31.1279
-41.2	-140.381	-32.959
-41.1	-141.602	-32.959
-41	-143.433	-28.6865
-40.9	-145.264	-32.959
-40.8	-140.991	-29.2969
-40.7	-137.939	-25.6348
-40.6	-141.602	-30.5176
-40.5	-139.16	-26.2451
-40.4	-137.329	-26.2451
-40.3	-140.991	-26.8555
-40.2	-141.602	-25.0244
-40.1	-136.719	-26.2451
-40	-138.55	-28.6865
-39.9	-141.602	-25.0244
-39.8	-140.381	-29.2969
-39.7	-139.16	-26.2451
-39.6	-137.329	-27.4658
-39.5	-130.615	-26.8555
-39.4	-136.719	-32.959
-39.3	-133.057	-28.0762
-39.2	-133.057	-31.7383
-39.1	-131.226	-26.2451
-39	-129.395	-26.8555
-38.9	-131.226	-26.2451
-38.8	-137.939	-26.2451
-38.7	-134.888	-21.3623
-38.6	-137.939	-30.5176
-38.5	-135.498	-21.9727
-38.4	-133.667	-23.8037
-38.3	-136.108	-28.0762
-38.2	-139.16	-23.1934
-38.1	-126.953	-29.2969
-38	-135.498	-27.4658
-37.9	-133.057	-21.9727
-37.8	-129.395	-29.2969
-37.7	-135.498	-22.583
-37.6	-126.953	-17.0898
-37.5	-131.836	-26.2451
-37.4	-130.005	-25.6348
-37.3	-139.771	-30.5176
-37.2	-134.277	-25.6348
-37.1	-136.108	-23.8037
-37	-135.498	-28.0762
-36.9	-138.55	-23.8037
-36.8	-138.55	-26.2451
-36.7	-134.277	-20.752
-36.6	-136.719	-23.8037
-36.5	-138.55	-20.1416
-36.4	-133.057	-20.1416
-36.3	-136.719	-18.9209
-36.2	-131.226	-25.0244
-36.1	-132.446	-30.5176
-36	-128.784	-26.8555
-35.9	-130.615	-26.8555
-35.8	-131.226	-23.1934
-35.7	-136.719	-16.4795
-35.6	-137.939	-18.9209
-35.5	-137.939	-21.3623
-35.4	-139.16	-26.2451
-35.3	-137.329	-26.2451
-35.2	-134.277	-28.6865
-35.1	-136.108	-27.4658
-35	-135.498	-26.8555
-34.9	-136.719	-26.8555
-34.8	-134.277	-26.8555
-34.7	-133.057	-26.8555
-34.6	-139.16	-28.6865
-34.5	-134.888	-24.4141
-34.4	-129.395	-21.9727
-34.3	-131.836	-20.752
-34.2	-134.277	-20.752
-34.1	-134.277	-23.8037
-34	-137.329	-23.1934
-33.9	-134.277	-29.9072
-33.8	-134.277	-23.8037
-33.7	-131.226	-26.2451
-33.6	-133.667	-24.4141
-33.5	-136.108	-15.2588
-33.4	-132.446	-18.9209
-33.3	-137.939	-17.0898
-33.2	-138.55	-17.0898
-33.1	-135.498	-18.9209
-33	-136.719	-25.0244
-32.9	-132.446	-25.0244
-32.8	-134.888	-23.8037
-32.7	-142.212	-23.8037
-32.6	-138.55	-23.8037
-32.5	-137.329	-29.2969
-32.4	-134.277	-21.9727
-32.3	-137.329	-20.752
-32.2	-136.108	-18.9209
-32.1	-135.498	-24.4141
-32	-135.498	-25.0244
-31.9	-133.667	-28.0762
-31.8	-133.667	-30.5176
-31.7	-132.446	-31.1279
-31.6	-131.226	-26.8555
-31.5	-133.667	-20.752
-31.4	-132.446	-22.583
-31.3	-134.277	-23.8037
-31.2	-133.667	-21.3623
-31.1	-129.395	-22.583
-31	-131.836	-20.752
-30.9	-130.005	-18.3105
-30.8	-132.446	-17.0898
-30.7	-135.498	-10.376
-30.6	-131.836	-16.4795
-30.5	-132.446	-17.0898
-30.4	-134.888	-22.583
-30.3	-127.563	-18.3105
-30.2	-134.888	-12.8174
-30.1	-132.446	-21.9727
-30	-132.446	-21.9727
-29.9	-127.563	-21.3623
-29.8	-129.395	-18.3105
-29.7	-125.122	-18.9209
-29.6	-131.226	-18.3105
-29.5	-131.226	-22.583
-29.4	-125.122	-17.7002
-29.3	-132.446	-13.4277
-29.2	-127.563	-17.0898
-29.1	-125.122	-21.3623
-29	-125.122	-17.7002
-28.9	-123.291	-15.8691
-28.8	-123.901	-14.0381
-28.7	-126.343	-19.5313
-28.6	-123.901	-18.9209
-28.5	-126.953	-19.5313
-28.4	-123.291	-18.3105
-28.3	-125.122	-17.7002
-28.2	-125.732	-17.7002
-28.1	-131.226	-13.4277
-28	-130.615	-17.7002
-27.9	-125.122	-17.7002
-27.8	-126.953	-16.4795
-27.7	-131.226	-16.4795
-27.6	-125.122	-17.0898
-27.5	-126.953	-15.2588
-27.4	-128.174	-15.8691
-27.3	-122.681	-15.2588
-27.2	-131.226	-17.7002
-27.1	-125.732	-15.2588
-27	-124.512	-9.15527
-26.9	-126.343	-15.8691
-26.8	-123.901	-17.0898
-26.7	-118.408	-17.7002
-26.6	-122.681	-10.9863
-26.5	-126.953	-12.207
-26.4	-123.291	-16.4795
-26.3	-116.577	-16.4795
-26.2	-123.291	-10.9863
-26.1	-123.901	-9.15527
-26	-125.122	-11.5967
-25.9	-123.901	-12.207
-25.8	-124.512	-8.54492
-25.7	-118.408	-8.54492
-25.6	-124.512	-9.15527
-25.5	-120.85	-13.4277
-25.4	-123.901	-12.207
-25.3	-120.85	-9.76563
-25.2	-121.46	-10.376
-25.1	-125.732	-10.9863
-25	-120.85	-14.6484
-24.9	-114.136	-10.376
-24.8	-120.85	-8.54492
-24.7	-119.019	-14.6484
-24.6	-117.188	-15.8691
-24.5	-118.408	-9.76563
-24.4	-120.239	-10.376
-24.3	-123.901	-9.15527
-24.2	-114.746	-7.93457
-24.1	-111.084	-15.2588
-24	-115.356	-15.2588
-23.9	-114.746	-13.4277
-23.8	-114.746	-8.54492
-23.7	-119.019	-9.15527
-23.6	-111.694	-6.10352
-23.5	-115.356	-6.10352
-23.4	-118.408	-6.71387
-23.3	-117.798	-10.9863
-23.2	-118.408	-12.207
-23.1	-121.46	-14.0381
-23	-119.629	-9.15527
-22.9	-117.798	-8.54492
-22.8	-115.967	-10.9863
-22.7	-114.136	-10.9863
-22.6	-113.525	-9.76563
-22.5	-116.577	-12.8174
-22.4	-111.694	-8.54492
-22.3	-109.253	-12.207
-22.2	-106.812	-7.93457
-22.1	-109.863	-7.32422
-22	-109.863	-5.49316
-21.9	-106.812	-5.49316
-21.8	-106.812	-1.83105
-21.7	-114.746	0.610352
-21.6	-115.356	-7.32422
-21.5	-112.305	-9.15527
-21.4	-105.591	-3.66211
-21.3	-104.37	-5.49316
-21.2	-105.591	-7.32422
-21.1	-105.591	-2.44141
-21	-106.812	-3.05176
-20.9	-106.201	-12.207
-20.8	-100.098	-5.49316
-20.7	-105.591	-9.15527
-20.6	-108.032	-4.88281
-20.5	-103.76	-6.10352
-20.4	-103.76	-1.83105
-20.3	-109.863	-6.71387
-20.2	-111.694	-8.54492
-20.1	-111.084	-9.15527
-20	-106.201	-7.32422
-19.9	-110.474	-7.32422
-19.8	-112.305	-6.71387
-19.7	-112.305	-9.15527
-19.6	-112.915	-6.10352
-19.5	-111.084	-5.49316
-19.4	-111.694	-8.54492
-19.3	-108.032	-7.93457
-19.2	-109.253	-6.71387
-19.1	-110.474	-2.44141
-19	-108.032	0
-18.9	-105.591	-6.71387
-18.8	-105.591	-4.88281
-18.7	-108.032	-7.93457
-18.6	-110.474	-4.27246
-18.5	-108.643	-4.27246
-18.4	-108.032	-4.27246
-18.3	-101.929	-6.71387
-18.2	-100.708	-1.2207
-18.1	-98.877	-1.2207
-18	-104.37	-6.10352
-17.9	-109.253	-2.44141
-17.8	-104.98	0
-17.7	-103.76	-2.44141
-17.6	-102.539	-1.83105
-17.5	-100.708	-1.83105
-17.4	-101.318	-0.61035
-17.3	-97.0459	-6.10352
-17.2	-98.877	-4.27246
-17.1	-101.929	3.66211
-17	-101.318	1.2207
-16.9	-108.032	-2.44141
-16.8	-100.708	-1.83105
-16.7	-102.539	-4.27246
-16.6	-104.37	-3.66211
-16.5	-100.098	-4.27246
-16.4	-95.8252	-6.10352
-16.3	-98.2666	0
-16.2	-99.4873	3.66211
-16.1	-90.9424	1.83105
-16	-95.8252	-2.44141
-15.9	-103.76	-4.27246
-15.8	-101.929	-1.2207
-15.7	-100.708	-1.83105
-15.6	-93.3838	5.49316
-15.5	-95.8252	-2.44141
-15.4	-97.0459	-1.2207
-15.3	-94.6045	-4.27246
-15.2	-89.7217	0
-15.1	-92.7734	-3.05176
-15	-87.2803	0
-14.9	-90.9424	6.10352
-14.8	-93.9941	1.83105
-14.7	-90.9424	7.32422
-14.6	-89.1113	0.610352
-14.5	-96.4355	1.83105
-14.4	-95.2148	0
-14.3	-95.2148	-0.61035
-14.2	-97.0459	-2.44141
-14.1	-95.2148	-0.61035
-14	-89.7217	0
-13.9	-92.7734	0
-13.8	-93.9941	-3.05176
-13.7	-87.2803	3.66211
-13.6	-88.501	1.2207
-13.5	-84.2285	1.2207
-13.4	-86.6699	2.44141
-13.3	-84.2285	-1.83105
-13.2	-89.7217	-2.44141
-13.1	-85.4492	0
-13	-83.0078	0.610352
-12.9	-89.1113	1.83105
-12.8	-84.8389	1.2207
-12.7	-81.1768	1.83105
-12.6	-79.3457	10.376
-12.5	-81.1768	4.88281
-12.4	-80.5664	1.83105
-12.3	-78.125	3.66211
-12.2	-78.125	6.10352
-12.1	-76.2939	1.83105
-12	-73.2422	-0.61035
-11.9	-81.1768	-3.05176
-11.8	-83.0078	-3.66211
-11.7	-87.2803	1.2207
-11.6	-82.3975	2.44141
-11.5	-78.7354	1.83105
-11.4	-81.7871	5.49316
-11.3	-76.9043	3.05176
-11.2	-74.4629	3.05176
-11.1	-73.8525	7.93457
-11	-73.8525	7.93457
-10.9	-75.0732	4.27246
-10.8	-73.2422	6.10352
-10.7	-75.0732	7.32422
-10.6	-74.4629	3.66211
-10.5	-75.0732	6.71387
-10.4	-72.6318	6.10352
-10.3	-71.4111	6.71387
-10.2	-72.6318	3.66211
-10.1	-73.2422	4.27246
-10	-73.8525	7.93457
-9.9	-69.5801	8.54492
-9.8	-64.6973	10.376
-9.7	-70.1904	9.15527
-9.6	-72.6318	7.93457
-9.5	-73.8525	9.15527
-9.4	-68.3594	6.71387
-9.3	-69.5801	7.93457
-9.2	-67.1387	7.93457
-9.1	-65.918	14.0381
-9	-66.5283	10.376
-8.9	-68.3594	6.10352
-8.8	-65.918	9.15527
-8.7	-66.5283	7.93457
-8.6	-64.6973	6.10352
-8.5	-63.4766	12.207
-8.4	-61.6455	10.9863
-8.3	-58.5938	7.32422
-8.2	-62.8662	9.15527
-8.1	-62.2559	3.66211
-8	-59.8145	9.15527
-7.9	-61.6455	8.54492
-7.8	-64.0869	13.4277
-7.7	-62.8662	9.15527
-7.6	-64.0869	6.71387
-7.5	-56.1523	3.66211
-7.4	-54.3213	7.32422
-7.3	-54.3213	9.76563
-7.2	-57.373	12.207
-7.1	-55.542	11.5967
-7	-51.2695	9.76563
-6.9	-55.542	12.8174
-6.8	-54.3213	9.15527
-6.7	-53.7109	6.10352
-6.6	-50.6592	6.71387
-6.5	-54.3213	3.05176
-6.4	-48.8281	4.88281
-6.3	-55.542	12.207
-6.2	-51.8799	9.76563
-6.1	-47.6074	12.8174
-6	-53.1006	11.5967
-5.9	-53.1006	7.93457
-5.8	-52.4902	9.15527
-5.7	-54.3213	14.6484
-5.6	-51.8799	12.8174
-5.5	-51.2695	12.207
-5.4	-43.335	12.207
-5.3	-46.3867	12.8174
-5.2	-48.2178	12.8174
-5.1	-41.5039	10.9863
-5	-40.8936	12.207
-4.9	-46.3867	8.54492
-4.8	-43.9453	10.376
-4.7	-48.2178	15.8691
-4.6	-43.9453	16.4795
-4.5	-39.6729	14.0381
-4.4	-43.9453	20.1416
-4.3	-47.6074	15.8691
-4.2	-37.8418	17.7002
-4.1	-39.6729	14.6484
-4	-40.2832	9.76563
-3.9	-42.7246	10.376
-3.8	-37.8418	7.93457
-3.7	-32.3486	10.9863
-3.6	-29.9072	10.9863
-3.5	-30.5176	19.5313
-3.4	-36.6211	13.4277
-3.3	-32.3486	21.9727
-3.2	-31.1279	10.376
-3.1	-26.2451	9.15527
-3	-25.0244	14.6484
-2.9	-22.583	14.0381
-2.8	-22.583	12.8174
-2.7	-26.2451	17.0898
-2.6	-29.9072	19.5313
-2.5	-26.8555	15.2588
-2.4	-24.4141	14.6484
-2.3	-23.1934	23.8037
-2.2	-23.8037	20.752
-2.1	-22.583	18.9209
-2	-21.9727	16.4795
-1.9	-19.5313	21.9727
-1.8	-22.583	15.8691
-1.7	-21.9727	17.7002
-1.6	-23.8037	12.207
-1.5	-23.1934	17.7002
-1.4	-20.1416	20.1416
-1.3	-21.3623	17.7002
-1.2	-21.3623	18.3105
-1.1	-15.2588	22.583
-1	-14.6484	20.752
-0.9	-17.0898	17.0898
-0.8	-17.7002	24.4141
-0.7	-17.0898	25.6348
-0.6	-18.3105	18.3105
-0.5	-20.752	16.4795
-0.4	-17.7002	18.3105
-0.3	-17.7002	20.752
-0.2	-17.7002	16.4795
-0.1	-12.8174	18.3105
-5.7e-12	-13.4277	20.1416
0.1	-12.207	19.5313
0.2	-14.6484	18.9209
0.3	-14.0381	21.3623
0.4	-5.49316	21.3623
0.5	-7.93457	25.0244
0.6	-4.88281	22.583
0.7	-7.32422	20.1416
0.8	-9.76563	19.5313
0.9	-9.15527	21.3623
1	-3.66211	25.6348
1.1	-7.32422	24.4141
1.2	-4.27246	21.9727
1.3	-2.44141	18.3105
1.4	1.2207	20.1416
1.5	3.66211	20.1416
1.6	3.05176	25.6348
1.7	2.44141	22.583
1.8	1.83105	25.0244
1.9	0.610352	22.583
2	4.27246	23.1934
2.1	9.76563	24.4141
2.2	9.15527	28.0762
2.3	6.10352	26.8555
2.4	8.54492	27.4658
2.5	11.5967	25.6348
2.6	9.76563	29.2969
2.7	12.8174	23.1934
2.8	11.5967	27.4658
2.9	17.0898	23.8037
3	15.8691	17.7002
3.1	14.0381	22.583
3.2	13.4277	21.3623
3.3	11.5967	20.752
3.4	21.3623	16.4795
3.5	18.9209	21.3623
3.6	14.6484	28.6865
3.7	16.4795	31.7383
3.8	19.5313	27.4658
3.9	21.3623	29.9072
4	26.8555	28.0762
4.1	26.8555	25.6348
4.2	26.2451	28.0762
4.3	23.1934	22.583
4.4	28.6865	28.0762
4.5	28.6865	30.5176
4.6	30.5176	28.6865
4.7	37.2314	25.0244
4.8	30.5176	23.8037
4.9	33.5693	32.959
5	35.4004	29.2969
5.1	34.79	26.2451
5.2	39.0625	29.2969
5.3	36.0107	23.8037
5.4	39.0625	26.8555
5.5	35.4004	29.2969
5.6	38.4521	29.2969
5.7	41.5039	32.959
5.8	38.4521	34.1797
5.9	40.2832	36.0107
6	37.8418	33.5693
6.1	41.5039	26.2451
6.2	43.335	26.8555
6.3	46.9971	31.7383
6.4	45.166	30.5176
6.5	53.7109	37.2314
6.6	50.6592	31.7383
6.7	58.5938	29.2969
6.8	53.1006	29.2969
6.9	57.373	29.2969
7	49.4385	28.6865
7.1	56.1523	32.3486
7.2	56.1523	25.0244
7.3	51.8799	29.9072
7.4	60.4248	33.5693
7.5	57.9834	37.2314
7.6	55.542	35.4004
7.7	61.6455	34.79
7.8	57.9834	31.1279
7.9	57.9834	34.1797
8	61.0352	34.79
8.1	67.749	31.1279
8.2	64.6973	37.8418
8.3	70.8008	38.4521
8.4	68.9697	36.6211
8.5	67.1387	41.5039
8.6	67.749	40.8936
8.7	70.1904	39.0625
8.8	70.1904	36.6211
8.9	76.2939	36.6211
9	75.6836	35.4004
9.1	76.2939	31.7383
9.2	74.4629	34.1797
9.3	75.6836	32.959
9.4	78.7354	34.1797
9.5	83.0078	34.1797
9.6	80.5664	38.4521
9.7	82.3975	39.0625
9.8	86.0596	36.6211
9.9	87.2803	40.2832
10	89.7217	40.2832
10.1	87.8906	34.79
10.2	86.0596	38.4521
10.3	91.5527	38.4521
10.4	90.9424	43.9453
10.5	87.2803	45.7764
10.6	93.9941	42.1143
10.7	90.9424	37.8418
10.8	89.7217	37.8418
10.9	97.6563	39.6729
11	99.4873	37.8418
11.1	97.0459	35.4004
11.2	97.0459	39.0625
11.3	99.4873	38.4521
11.4	98.2666	39.6729
11.5	101.318	46.3867
11.6	108.643	46.3867
11.7	109.863	42.1143
11.8	115.967	47.6074
11.9	112.305	40.2832
12	115.356	39.0625
12.1	114.136	45.7764
12.2	111.694	47.6074
12.3	119.019	48.8281
12.4	117.188	50.0488
12.5	120.85	43.335
12.6	115.967	46.3867
12.7	122.07	43.335
12.8	125.732	45.166
12.9	120.85	46.9971
13	119.019	41.5039
13.1	124.512	48.8281
13.2	125.732	47.6074
13.3	125.732	43.335
13.4	125.732	47.6074
13.5	126.953	43.335
13.6	132.446	44.5557
13.7	126.343	47.6074
13.8	125.732	46.3867
13.9	134.277	45.166
14	134.888	42.7246
14.1	133.667	51.8799
14.2	130.005	43.9453
14.3	137.329	47.6074
14.4	140.381	43.335
14.5	144.653	47.6074
14.6	141.602	57.373
14.7	147.095	56.1523
14.8	153.198	51.2695
14.9	156.86	49.4385
15	156.86	46.3867
15.1	158.081	52.4902
15.2	154.419	50.0488
15.3	155.64	52.4902
15.4	159.912	53.1006
15.5	156.25	50.0488
15.6	153.198	54.3213
15.7	160.522	50.6592
15.8	169.067	56.1523
15.9	169.067	56.7627
16	162.354	54.3213
16.1	173.34	54.9316
16.2	166.626	60.4248
16.3	173.34	55.542
16.4	169.067	61.0352
16.5	167.236	56.7627
16.6	167.847	53.7109
16.7	173.95	56.7627
16.8	176.392	59.2041
16.9	181.274	62.8662
17	175.171	62.2559
17.1	173.95	56.1523
17.2	184.326	59.2041
17.3	179.443	57.373
17.4	186.157	56.7627
17.5	192.871	57.9834
17.6	189.819	60.4248
17.7	190.43	55.542
17.8	195.923	56.7627
17.9	196.533	62.8662
18	192.261	62.8662
18.1	195.923	60.4248
18.2	197.754	59.2041
18.3	197.144	57.373
18.4	201.416	58.5938
18.5	207.52	64.0869
18.6	209.351	62.2559
18.7	205.688	68.3594
18.8	201.416	64.0869
18.9	205.078	66.5283
19	206.299	62.2559
19.1	216.675	62.2559
19.2	218.506	63.4766
19.3	216.064	61.0352
19.4	216.064	58.5938
19.5	223.389	65.918
19.6	223.389	64.0869
19.7	228.882	60.4248
19.8	228.882	70.8008
19.9	233.765	70.1904
20	230.103	69.5801
20.1	230.103	69.5801
20.2	228.271	65.918
20.3	236.816	65.3076
20.4	234.375	68.9697
20.5	234.375	64.6973
20.6	234.375	59.2041
20.7	233.765	60.4248
20.8	238.037	65.918
20.9	240.479	67.749
21	242.92	65.3076
21.1	245.361	67.1387
21.2	247.192	67.749
21.3	252.686	68.9697
21.4	253.906	69.5801
21.5	250.854	72.0215
21.6	253.296	68.3594
21.7	258.179	70.1904
21.8	250.854	71.4111
21.9	255.737	72.6318
22	267.944	70.1904
22.1	269.775	71.4111
22.2	268.555	73.2422
22.3	267.334	75.6836
22.4	266.724	74.4629
22.5	269.165	73.8525
22.6	271.606	81.1768
22.7	270.386	80.5664
22.8	278.931	75.6836
22.9	282.593	70.1904
23	279.541	75.6836
23.1	281.372	75.0732
23.2	282.593	74.4629
23.3	290.527	74.4629
23.4	290.527	72.6318
23.5	290.527	79.9561
23.6	294.189	80.5664
23.7	294.189	78.7354
23.8	295.41	77.5146
23.9	294.8	82.3975
24	297.852	79.3457
24.1	297.852	76.9043
24.2	294.8	81.1768
24.3	300.293	75.0732
24.4	296.021	74.4629
24.5	301.514	72.6318
24.6	305.176	75.0732
24.7	311.89	75.0732
24.8	314.331	79.9561
24.9	314.331	79.3457
25	311.279	78.125
25.1	314.941	79.9561
25.2	311.89	81.7871
25.3	322.876	81.7871
25.4	321.045	85.4492
25.5	324.097	81.1768
25.6	325.928	80.5664
25.7	330.2	81.1768
25.8	333.862	81.7871
25.9	331.421	79.9561
26	335.083	85.4492
26.1	333.252	84.2285
26.2	335.693	81.7871
26.3	341.797	85.4492
26.4	341.797	87.2803
26.5	339.355	83.6182
26.6	344.238	84.2285
26.7	347.9	80.5664
26.8	348.511	84.8389
26.9	355.225	88.501
27	356.445	85.4492
27.1	360.718	88.501
27.2	361.328	89.1113
27.3	360.718	93.3838
27.4	362.549	92.1631
27.5	363.77	84.8389
27.6	367.432	86.0596
27.7	372.314	85.4492
27.8	374.756	90.332
27.9	371.094	93.3838
28	367.432	89.7217
28.1	371.704	89.7217
28.2	376.587	89.7217
28.3	377.197	88.501
28.4	380.249	93.3838
28.5	382.69	93.3838
28.6	386.353	91.5527
28.7	387.573	93.9941
28.8	392.456	95.2148
28.9	391.846	97.6563
29	394.897	98.877
29.1	393.066	100.098
29.2	391.235	101.318
29.3	399.17	103.76
29.4	404.053	99.4873
29.5	403.442	99.4873
29.6	409.546	98.2666
29.7	409.546	100.708
29.8	411.987	102.539
29.9	412.598	100.708
30	417.48	100.098
30.1	423.584	97.0459
30.2	426.636	100.098
30.3	423.584	95.8252
30.4	424.194	96.4355
30.5	425.415	105.591
30.6	428.467	103.76
30.7	428.467	103.76
30.8	435.181	97.6563
30.9	438.232	98.2666
31	439.453	99.4873
31.1	444.336	98.2666
31.2	444.946	97.6563
31.3	453.491	100.098
31.4	454.102	104.37
31.5	455.933	103.76
31.6	456.543	103.76
31.7	455.933	100.708
31.8	458.374	102.539
31.9	460.205	104.37
32	465.088	106.812
32.1	468.75	109.253
32.2	471.802	101.318
32.3	471.191	105.591
32.4	473.633	103.149
32.5	480.957	104.98
32.6	486.45	109.253
32.7	485.84	109.253
32.8	488.892	110.474
32.9	490.112	108.032
33	490.112	114.136
33.1	495.605	108.032
33.2	496.216	113.525
33.3	497.437	116.577
33.4	501.099	119.019
33.5	504.761	112.305
33.6	502.93	108.643
33.7	506.592	111.694
33.8	509.033	108.643
33.9	517.578	116.577
34	520.63	118.408
34.1	516.968	117.798
34.2	520.63	115.356
34.3	527.344	117.798
34.4	529.175	116.577
34.5	531.006	113.525
34.6	537.109	118.408
34.7	534.058	114.746
34.8	540.161	122.07
34.9	545.654	119.629
35	546.265	120.85
35.1	547.485	123.291
35.2	546.265	120.239
35.3	545.654	121.46
35.4	550.537	122.07
35.5	559.082	123.901
35.6	556.03	122.681
35.7	565.186	128.174
35.8	564.575	126.953
35.9	567.017	128.784
36	565.796	129.395
36.1	573.12	125.732
36.2	579.224	122.681
36.3	576.172	120.85
36.4	576.782	119.629
36.5	579.224	126.343
36.6	579.224	127.563
36.7	584.717	134.277
36.8	581.665	132.446
36.9	588.989	130.005
37	595.093	129.395
37.1	596.313	130.005
37.2	593.872	133.057
37.3	597.534	131.836
37.4	604.248	130.005
37.5	606.079	133.057
37.6	612.793	131.836
37.7	614.624	131.836
37.8	612.183	131.226
37.9	615.234	137.329
38	616.455	134.277
38.1	620.728	134.277
38.2	627.441	131.226
38.3	628.052	134.277
38.4	632.935	140.991
38.5	640.259	134.277
38.6	642.09	134.888
38.7	643.921	139.16
38.8	645.142	142.822
38.9	645.752	137.939
39	653.687	137.939
39.1	655.518	137.939
39.2	658.569	140.381
39.3	660.4	142.822
39.4	665.283	143.433
39.5	665.283	141.602
39.6	665.283	136.719
39.7	673.828	139.16
39.8	675.049	144.043
39.9	676.27	145.874
40	676.27	145.874
40.1	682.983	145.874
40.2	689.087	146.484
40.3	693.359	149.536
40.4	700.073	150.146
40.5	699.463	147.095
40.6	700.684	150.146
40.7	696.411	150.146
40.8	704.346	150.146
40.9	706.177	150.757
41	713.501	148.926
41.1	717.773	150.757
41.2	723.877	150.757
41.3	728.149	155.64
41.4	727.539	153.198
41.5	732.422	149.536
41.6	734.253	153.198
41.7	736.084	156.25
41.8	740.356	155.64
41.9	741.577	155.029
42	747.681	159.912
42.1	755.005	163.574
42.2	755.005	160.522
42.3	756.836	159.912
42.4	756.836	158.691
42.5	761.108	160.522
42.6	762.939	167.236
42.7	759.888	160.522
42.8	767.822	164.185
42.9	773.315	161.133
43	775.146	161.743
43.1	783.081	162.964
43.2	784.912	166.016
43.3	788.574	165.405
43.4	793.457	166.016
43.5	793.457	168.457
43.6	801.392	169.678
43.7	795.898	172.729
43.8	800.171	167.236
43.9	803.833	169.067
44	807.495	169.067
44.1	812.378	172.729
44.2	816.65	169.678
44.3	815.43	176.392
44.4	817.871	170.898
44.5	826.416	167.847
44.6	829.468	167.236
44.7	838.013	175.171
44.8	843.506	176.392
44.9	839.844	180.054
45	848.389	178.223
45.1	844.116	180.664
45.2	852.661	183.105
45.3	853.882	177.002
45.4	856.323	181.274
45.5	859.375	180.054
45.6	859.985	178.833
45.7	858.154	177.612
45.8	866.699	178.833
45.9	869.751	184.326
46	873.413	181.274
46.1	878.296	182.495
46.2	881.958	181.885
46.3	881.958	179.443
46.4	886.23	185.547
46.5	887.451	185.547
46.6	895.386	189.819
46.7	895.996	184.937
46.8	902.1	179.443
46.9	908.203	181.885
47	906.982	183.716
47.1	917.358	183.716
47.2	924.072	188.599
47.3	922.241	192.261
47.4	923.462	192.871
47.5	929.565	194.702
47.6	931.396	194.702
47.7	932.007	192.871
47.8	936.89	193.481
47.9	942.993	195.313
48	944.824	195.923
48.1	947.876	202.026
48.2	952.759	200.806
48.3	959.473	203.247
48.4	968.628	206.909
48.5	967.407	208.13
48.6	974.121	206.299
48.7	977.173	208.13
48.8	979.004	201.416
48.9	986.328	210.571
49	985.718	209.351
49.1	986.938	209.961
49.2	995.483	209.351
49.3	994.263	215.454
49.4	1004.64	213.623
49.5	1008.3	215.454
49.6	1010.13	217.285
49.7	1016.24	216.064
49.8	1014.4	222.778
49.9	1027.22	216.675
50	1025.39	220.947
50.1	1033.33	217.896
50.2	1037.6	217.285
50.3	1041.26	222.778
50.4	1041.87	216.064
50.5	1037.6	221.558
50.6	1047.36	222.778
50.7	1047.36	222.168
50.8	1051.03	218.506
50.9	1055.91	219.116
51	1054.08	219.727
51.1	1065.06	224.609
51.2	1073.61	228.882
51.3	1075.44	226.44
51.4	1083.37	229.492
51.5	1076.66	228.882
51.6	1082.76	226.44
51.7	1090.09	230.103
51.8	1090.09	233.154
51.9	1099.24	235.596
52	1105.35	239.868
52.1	1108.4	239.258
52.2	1113.28	241.089
52.3	1109.62	240.479
52.4	1121.83	240.479
52.5	1126.1	244.751
52.6	1135.25	245.361
52.7	1132.81	242.92
52.8	1141.36	246.582
52.9	1149.9	242.92
53	1151.73	245.972
53.1	1159.06	243.53
53.2	1156.62	244.141
53.3	1158.45	251.465
53.4	1166.99	256.958
53.5	1166.38	252.686
53.6	1171.88	252.686
53.7	1172.49	258.179
53.8	1176.76	253.296
53.9	1179.81	256.958
54	1184.69	254.517
54.1	1188.96	260.01
54.2	1193.85	253.296
54.3	1200.56	253.296
54.4	1209.72	257.568
54.5	1211.55	261.841
54.6	1210.94	259.399
54.7	1210.33	258.789
54.8	1224.98	264.893
54.9	1228.03	268.555
55	1238.4	267.334
55.1	1238.4	267.944
55.2	1239.01	274.658
55.3	1240.84	269.165
55.4	1242.68	274.048
55.5	1250.61	267.334
55.6	1251.83	274.048
55.7	1262.21	272.217
55.8	1264.65	279.541
55.9	1270.75	279.541
56	1276.25	279.541
56.1	1278.69	285.034
56.2	1283.57	280.151
56.3	1295.78	284.424
56.4	1295.78	277.1
56.5	1299.44	281.372
56.6	1298.83	280.151
56.7	1305.54	279.541
56.8	1315.92	280.762
56.9	1316.53	285.645
57	1315.92	285.645
57.1	1320.8	286.865
57.2	1331.79	287.476
57.3	1337.28	291.138
57.4	1333.62	293.579
57.5	1339.11	292.358
57.6	1350.1	289.917
57.7	1350.1	296.631
57.8	1354.37	296.021
57.9	1356.81	297.852
58	1364.14	296.631
58.1	1372.68	302.124
58.2	1375.73	301.514
58.3	1375.73	303.955
58.4	1386.72	307.617
58.5	1385.5	303.345
58.6	1389.77	303.345
58.7	1389.77	302.734
58.8	1393.43	307.007
58.9	1403.81	313.721
59	1411.74	315.552
59.1	1413.57	317.993
59.2	1419.68	314.941
59.3	1427	309.448
59.4	1429.44	315.552
59.5	1434.94	323.486
59.6	1439.82	323.486
59.7	1443.48	326.538
59.8	1439.21	328.979
59.9	1445.31	333.252
60	1458.13	330.2
60.1	1466.06	325.317
60.2	1467.9	327.148
60.3	1474.61	328.369
60.4	1482.54	330.811
60.5	1489.26	328.979
60.6	1487.43	324.707
60.7	1494.14	323.486
60.8	1490.48	325.928
60.9	1493.53	336.914
61	1502.08	340.576
61.1	1508.18	336.304
61.2	1511.23	338.135
61.3	1516.72	338.745
61.4	1517.33	339.355
61.5	1519.17	340.576
61.6	1527.1	344.849
61.7	1535.64	335.083
61.8	1541.75	337.524
61.9	1543.58	343.628
62	1552.12	344.849
62.1	1559.45	341.797
62.2	1559.45	341.797
62.3	1566.16	347.29
62.4	1573.49	356.445
62.5	1579.59	358.276
62.6	1580.81	352.173
62.7	1587.52	358.887
62.8	1603.39	357.056
62.9	1606.45	354.614
63	1609.5	358.887
63.1	1613.77	360.107
63.2	1616.82	364.38
63.3	1622.92	360.718
63.4	1627.81	360.718
63.5	1631.47	363.159
63.6	1640.63	360.718
63.7	1639.4	361.938
63.8	1638.18	369.263
63.9	1646.73	370.483
64	1654.05	372.925
64.1	1660.16	374.146
64.2	1664.43	377.808
64.3	1669.92	375.366
64.4	1676.64	373.535
64.5	1676.64	376.587
64.6	1679.08	372.925
64.7	1683.96	372.314
64.8	1691.28	372.925
64.9	1698.61	377.808
65	1699.22	377.808
65.1	1702.88	381.47
65.2	1708.98	383.911
65.3	1716.31	385.132
65.4	1715.09	388.794
65.5	1726.68	389.404
65.6	1733.4	384.521
65.7	1730.96	390.015
65.8	1745.61	383.911
65.9	1751.71	383.911
66	1757.2	382.69
66.1	1768.19	389.404
66.2	1765.75	387.573
66.3	1774.9	391.235
66.4	1776.12	390.625
66.5	1782.23	396.729
66.6	1784.06	397.339
66.7	1791.38	402.832
66.8	1793.82	407.715
66.9	1804.2	405.273
67	1810.3	401.611
67.1	1820.68	403.442
67.2	1823.12	406.494
67.3	1830.44	407.715
67.4	1837.16	407.104
67.5	1845.7	410.767
67.6	1846.31	413.208
67.7	1842.65	413.818
67.8	1848.75	418.701
67.9	1858.52	419.922
68	1864.62	418.701
68.1	1873.17	422.363
68.2	1876.22	426.025
68.3	1878.66	416.87
68.4	1888.43	422.363
68.5	1891.48	422.974
68.6	1893.31	422.363
68.7	1906.74	422.974
68.8	1907.96	427.856
68.9	1914.67	436.401
69	1916.5	432.129
69.1	1927.49	427.856
69.2	1933.59	434.57
69.3	1937.87	435.181
69.4	1939.7	437.012
69.5	1948.24	436.401
69.6	1953.74	441.284
69.7	1951.9	441.895
69.8	1965.94	440.674
69.9	1969.6	444.946
70	1977.54	443.115
70.1	1988.53	446.167
70.2	1992.19	448.608
70.3	1998.9	445.557
70.4	2000.73	443.115
70.5	2008.67	450.439
70.6	2016.6	449.219
70.7	2017.82	447.388
70.8	2025.76	455.933
70.9	2032.47	451.66
71	2033.69	452.881
71.1	2037.35	454.102
71.2	2039.18	463.257
71.3	2047.12	465.088
71.4	2055.05	463.257
71.5	2061.77	462.646
71.6	2063.6	462.646
71.7	2076.42	470.581
71.8	2082.52	469.971
71.9	2082.52	471.191
72	2086.79	477.295
72.1	2101.44	474.243
72.2	2098.39	474.854
72.3	2108.15	474.243
72.4	2115.48	477.905
72.5	2120.97	481.567
72.6	2127.08	482.178
72.7	2131.96	481.567
72.8	2138.67	478.516
72.9	2147.83	483.398
73	2155.15	490.723
73.1	2161.25	498.657
73.2	2160.64	503.54
73.3	2170.41	503.54
73.4	2177.12	504.761
73.5	2178.34	501.709
73.6	2194.21	508.423
73.7	2200.32	507.202
73.8	2202.15	502.319
73.9	2194.21	501.099
74	2209.47	510.864
74.1	2210.08	512.085
74.2	2218.63	511.475
74.3	2227.78	514.526
74.4	2232.67	511.475
74.5	2238.77	512.695
74.6	2249.15	513.306
74.7	2255.86	512.085
74.8	2263.79	512.085
74.9	2271.73	522.461
75	2280.88	526.733
75.1	2289.43	532.227
75.2	2297.36	530.396
75.3	2300.42	527.954
75.4	2297.97	522.461
75.5	2310.79	526.733
75.6	2320.56	529.175
75.7	2324.22	529.785
75.8	2329.71	535.889
75.9	2341.31	531.006
76	2348.02	527.344
76.1	2346.19	531.006
76.2	2348.63	537.72
76.3	2355.35	540.161
76.4	2357.79	544.434
76.5	2366.33	548.096
76.6	2370.61	554.199
76.7	2374.88	558.472
76.8	2385.25	554.81
76.9	2393.19	556.641
77	2401.73	555.42
77.1	2411.5	560.303
77.2	2416.99	561.523
77.3	2416.38	561.523
77.4	2425.54	560.913
77.5	2435.91	561.523
77.6	2443.85	562.744
77.7	2448.12	569.458
77.8	2451.78	572.51
77.9	2459.11	574.951
78	2462.77	583.496
78.1	2470.7	588.379
78.2	2478.03	591.431
78.3	2484.13	588.379
78.4	2492.68	588.379
78.5	2499.39	585.938
78.6	2502.44	584.717
78.7	2517.09	586.548
78.8	2521.97	595.703
78.9	2526.25	595.093
79	2534.18	600.586
79.1	2537.84	601.196
79.2	2538.45	606.079
79.3	2550.66	601.807
79.4	2557.37	606.689
79.5	2565.92	607.3
79.6	2569.58	614.014
79.7	2578.13	619.507
79.8	2582.4	623.169
79.9	2592.77	624.39
80	2604.37	628.052
80.1	2608.64	623.779
80.2	2601.93	625.61
80.3	2614.75	628.052
80.4	2626.95	631.714
80.5	2623.29	628.052
80.6	2631.84	634.155
80.7	2640.38	637.207
80.8	2647.09	635.986
80.9	2662.35	639.648
81	2672.12	643.921
81.1	2681.88	645.142
81.2	2690.43	645.142
81.3	2697.75	643.921
81.4	2703.86	650.635
81.5	2707.52	653.076
81.6	2714.23	655.518
81.7	2718.51	656.128
81.8	2729.49	658.569
81.9	2736.21	659.18
82	2745.97	665.894
82.1	2752.08	672.607
82.2	2755.74	671.997
82.3	2765.5	679.321
82.4	2771	687.866
82.5	2780.76	697.021
82.6	2786.87	692.749
82.7	2791.75	690.918
82.8	2798.46	695.801
82.9	2805.79	698.242
83	2808.23	706.177
83.1	2809.45	702.515
83.2	2820.43	700.684
83.3	2825.93	709.839
83.4	2832.03	713.501
83.5	2836.3	708.008
83.6	2847.29	709.839
83.7	2861.94	709.229
83.8	2867.43	706.177
83.9	2875.98	712.28
84	2880.25	711.67
84.1	2886.96	705.566
84.2	2894.29	716.553
84.3	2905.27	721.436
84.4	2906.49	726.929
84.5	2915.04	733.643
84.6	2920.53	736.084
84.7	2931.52	739.136
84.8	2931.52	737.915
84.9	2942.5	738.525
85	2952.88	742.798
85.1	2966.31	742.798
85.2	2973.63	736.694
85.3	2971.19	741.577
85.4	2974.85	742.188
85.5	2980.96	753.174
85.6	2988.28	759.277
85.7	2993.77	762.939
85.8	3003.54	764.771
85.9	3013.31	763.55
86	3023.07	763.55
86.1	3027.95	764.771
86.2	3036.5	764.16
86.3	3045.65	773.926
86.4	3059.08	779.419
86.5	3063.35	787.964
86.6	3081.67	790.405
86.7	3091.43	795.898
86.8	3098.14	795.898
86.9	3098.75	798.34
87	3104.86	802.612
87.1	3118.9	811.157
87.2	3128.05	814.209
87.3	3134.77	808.716
87.4	3139.04	810.547
87.5	3144.53	812.988
87.6	3154.91	812.378
87.7	3153.69	816.04
87.8	3163.45	812.988
87.9	3173.22	816.04
88	3176.88	818.481
88.1	3189.7	821.533
88.2	3198.85	825.195
88.3	3207.4	820.313
88.4	3210.45	821.533
88.5	3218.38	821.533
88.6	3223.88	827.026
88.7	3233.64	822.754
88.8	3248.9	833.74
88.9	3253.17	831.909
89	3262.33	836.792
89.1	3269.65	839.233
89.2	3273.32	841.675
89.3	3283.69	842.896
89.4	3289.79	845.947
89.5	3303.83	848.389
89.6	3306.27	855.713
89.7	3316.04	860.596
89.8	3326.42	862.427
89.9	3339.84	866.089
90	3343.51	866.089
90.1	3341.67	868.53
90.2	3354.49	869.751
90.3	3357.54	876.465
90.4	3358.15	876.465
90.5	3370.97	873.413
90.6	3372.8	886.23
90.7	3380.74	889.282
90.8	3388.06	891.724
90.9	3396	891.724
91	3403.32	886.23
91.1	3412.48	888.672
91.2	3421.02	886.841
91.3	3430.18	891.113
91.4	3436.89	889.893
91.5	3439.94	888.672
91.6	3447.88	888.062
91.7	3456.42	898.438
91.8	3464.36	900.269
91.9	3469.24	903.931
92	3479	906.982
92.1	3488.16	907.593
92.2	3493.04	905.762
92.3	3509.52	913.086
92.4	3510.13	915.527
92.5	3523.56	924.072
92.6	3522.95	914.917
92.7	3536.99	922.241
92.8	3543.7	930.176
92.9	3558.35	931.396
93	3565.06	937.5
93.1	3571.17	942.383
93.2	3576.66	943.604
93.3	3587.65	946.045
93.4	3594.36	948.486
93.5	3603.52	949.707
93.6	3608.4	945.435
93.7	3619.38	952.148
93.8	3628.54	960.693
93.9	3635.86	955.811
94	3634.64	957.642
94.1	3645.63	963.745
94.2	3650.51	971.68
94.3	3667.6	976.563
94.4	3674.93	977.173
94.5	3684.69	975.952
94.6	3690.19	986.328
94.7	3699.34	986.328
94.8	3702.39	987.549
94.9	3720.09	989.99
95	3726.81	997.925
95.1	3732.91	996.704
95.2	3740.84	999.146
95.3	3746.95	1000.98
95.4	3753.66	999.146
95.5	3765.26	995.483
95.6	3772.58	998.535
95.7	3784.18	1002.81
95.8	3792.72	1007.08
95.9	3799.44	1013.79
96	3809.2	1017.46
96.1	3826.29	1016.85
96.2	3840.33	1019.29
96.3	3840.33	1013.79
96.4	3844.6	1012.57
96.5	3857.42	1018.07
96.6	3870.24	1015.01
96.7	3873.29	1022.95
96.8	3876.95	1024.78
96.9	3888.55	1026
97	3899.54	1038.21
97.1	3905.64	1044.92
97.2	3917.85	1049.8
97.3	3926.39	1063.23
97.4	3934.33	1055.3
97.5	3934.94	1055.91
97.6	3941.04	1063.84
97.7	3947.75	1058.35
97.8	3964.23	1060.79
97.9	3969.73	1068.73
98	3981.32	1068.12
98.1	3992.31	1077.88
98.2	4008.79	1082.15
98.3	4006.96	1077.88
98.4	4007.57	1082.15
98.5	4025.88	1085.21
98.6	4030.76	1092.53
98.7	4036.25	1096.19
98.8	4046.63	1099.24
98.9	4060.06	1112.67
99	4065.55	1114.5
99.1	4064.33	1119.38
99.2	4068.6	1124.88
99.3	4074.71	1127.93
99.4	4088.13	1123.05
99.5	4107.06	1129.15
99.6	4124.15	1134.03
99.7	4131.47	1143.8
99.8	4143.68	1143.19
99.9		1152.95

## Sheet: Figure 1 D
log10(PIP2 uM)	Cell1	Cell2	Cell3	Cell4	Cell5	Cell6	Cell7	Cell8	Cell9		Sigmoidal, 4PL, X is log(concentration)
-1	1	1	1	1	1	1	1	1	1		Best-fit values
0	0.957915	0.895297	0.931558	0.935706	0.93098	0.871055	0.794605	0.890333	0.887782		Top	0.9942
0.3979	0.837452	0.775735	0.815177	0.78284	0.838746	0.687429	0.622406	0.83072			Bottom	0.02637
0.6989	0.549544	0.516804	0.536913	0.473493	0.541629	0.371053	0.329356	0.502102			LogIC50	0.6913
1	0.260966	0.335338	0.301462	0.309985	0.385948	0.193275	0.190871	0.273596			HillSlope	-1.57
1.301						0.114912	0.103216	0.133741			IC50	4.913
											Span	0.9679
											95% CI (asymptotic)
											Top	0.8527 to 1.136
log10(PIP2 uM)	Mean normalized current										Bottom	-0.3335 to 0.3863
-1	1										LogIC50	0.4129 to 0.9698
0	0.89947										HillSlope	-2.885 to -0.2549
0.3979	0.773813										IC50	2.587 to 9.327
0.6989	0.477612										Span	0.5365 to 1.399
1	0.28143										Goodness of Fit
1.301	0.11729										Degrees of Freedom	2
											R squared	0.9963
											Adjusted R squared	0.9909
											Sum of Squares	0.002297
											Runs test
											Points above curve	3
											Points below curve	3
											Number of runs	6
											P value (runs test)	>0.9999
											Deviation from Model	Not Significant
											Number of points
											# of X values	6
											# Y values analyzed	6
