# Supplementary material for: Inhibition of the proton-activated chloride channel PAC by PIP2
Source: eLife. 2023 Jan 12;12:e83935. doi: 10.7554/eLife.83935 (PMC9876566; doi:10.7554/eLife.83935)
Supplement: Figure 2—source data 1. [file elife-83935-fig2-data1.xlsx]

## Sheet: Figure 2 A
pH 5.0	diC8-PI(3)P	diC8-PI(4,5)P2	diC8-PI(3,5)P2	diC8-PI(3,4,5)P3			Table Analyzed	% inhibiton phosphates
4.21992	33.5192	55	73.2619	78.5443			Data sets analyzed	A-E
-1.18173	16.6604	70	64.0706	68.38
15.3821	21.679	65	68.5172	66.9982			ANOVA summary
-1.03513	23.2668	75	65.2554	53.0461			F	94.6
11.3039	34.5668	63	74.8879	56.7032			P value	<0.0001
5.84915	23.4441	75	70.5642	47.2369			P value summary	****
-1.9954	27.0359	51.3809	63.6604	67.7328			Significant diff. among means (P < 0.05)?	Yes
6.21005		50.1195	60.1813	67.7043			R squared	0.8958
		50.5011	56.6153	60.3762
		51.6771		74.9478			Brown-Forsythe test
		43.4186		63.9182			F (DFn, DFd)	0.6969 (4, 44)
		53.5732					P value	0.5982
		49.8279					P value summary	ns
		56.095					Are SDs significantly different (P < 0.05)?	No
							Bartlett's test
							Bartlett's statistic (corrected)	4.044
							P value	0.4001
							P value summary	ns
							Are SDs significantly different (P < 0.05)?	No
							ANOVA table	SS	DF	MS	F (DFn, DFd)	P value
							Treatment (between columns)	25604	4	6401	F (4, 44) = 94.60	P<0.0001
							Residual (within columns)	2977	44	67.67
							Total	28582	48
							Data summary
							Number of treatments (columns)	5
							Number of values (total)	49

## Sheet: Figure 2 B
log10(PIP3 (uM))	Cell1	Cell3	Cell4	Cell5	Cell6	Cell7	Cell8		Sigmoidal, 4PL, X is log(concentration)
-1	1	1	1	1	1	1	1		Best-fit values
0	1.00758	0.813352	0.807485	0.775737	0.870292	0.826847	0.82912		Top	1.003
0.39	0.799326	0.661336	0.613299	0.525698	0.843529	0.628387	0.66608		Bottom	0.1712
0.69	0.439461	0.30275	0.272763	0.290631	0.715661	0.310837	0.3896		LogIC50	0.4705
1	0.404927	0.397705	0.221196	0.22843	0.535826	0.273953	0.30864		HillSlope	-1.463
1.3	0.22868	0.158948	0.146842	0.143695	0.428632	0.114224	0.17488		IC50	2.954
									Span	0.8314
									95% CI (asymptotic)
									Top	0.7338 to 1.271
log10(PIP3 (uM))	Mean normalized current								Bottom	-0.2555 to 0.5980
-1	1								LogIC50	0.001480 to 0.9394
0	0.847202								HillSlope	-3.649 to 0.7234
0.39	0.676808								IC50	1.003 to 8.699
0.69	0.388815								Span	0.2608 to 1.402
1	0.338668								Goodness of Fit
1.3	0.199414								Degrees of Freedom	2
									R squared	0.9866
									Adjusted R squared	0.9666
									Sum of Squares	0.006639
									Runs test
									Points above curve	3
									Points below curve	3
									Number of runs	6
									P value (runs test)	>0.9999
									Deviation from Model	Not Significant
									Number of points
									# of X values	6
									# Y values analyzed	6

## Sheet: Figure 2 C
log10(PI (uM))	Cell1	Cell2	Cell3	Cell4	Cell5	Cell6		Sigmoidal, 4PL, X is log(concentration)
0.3979	1	1	1	1	1	1		Best-fit values
0.6989	0.969298	0.939225	1	0.956536	0.95605	0.989649		Top	0.9656
1	1.01949	0.850464	0.879183	0.798144	0.736142	0.802683		Bottom	0.2141
1.397	0.798677	0.606235	0.755145	0.69565	0.550998	0.614736		LogIC50	1.432
1.69	0.49679	0.288945	0.216184	0.287055	0.157586	0.331877		HillSlope	-2.635
2	0.493367	0.259501	0.172412	0.203679	0.165268	0.28777		IC50	27.04
								Span	0.7515
								95% CI (asymptotic)
								Top	0.7291 to 1.202
log10(PI (uM))	Mean normalized current							Bottom	-0.2414 to 0.6696
0.3979	1							LogIC50	1.077 to 1.787
0.6989	0.968586							HillSlope	-8.683 to 3.413
1	0.847684							IC50	11.95 to 61.18
1.397	0.67024							Span	0.1732 to 1.330
1.69	0.296406							Goodness of Fit
2	0.263666							Degrees of Freedom	2
								R squared	0.9803
								Adjusted R squared	0.9508
								Sum of Squares	0.01052
								Runs test
								Points above curve	4
								Points below curve	2
								Number of runs	5
								P value (runs test)	>0.9999
								Deviation from Model	Not Significant
								Number of points
								# of X values	6
								# Y values analyzed	6

## Sheet: Figure 2 D
pH 5.0	diC8-DAG	diC8-PI	IP3(1,4,5)	diC6-PI(3,5)P2	diC18:0-20:4 PI(4,5)P2		Table Analyzed	% inhibiton chain
4.21992	-7.369	21.6826	36.9425	13.833	43.8913		Data sets analyzed	A-F
-1.18173	-1.571	19.8828	26.0487	8.81029	45.0084
15.3821	-17.097	21.2615	25.3864	21.158	55.8934		ANOVA summary
-1.03513	4.2304	29.9118	16.7618	11.6448	54.1594		F	44.89
11.3039	-4.716	25.7978	16.6628	31.9339	58.576		P value	<0.0001
5.84915	13.3411	11.0602	19.897	24.929	61.649		P value summary	****
-1.9954		25.9473	26.0487	19.838	45.0263		Significant diff. among means (P < 0.05)?	Yes
6.21005		28.5454	12.3167		56.327		R squared	0.833
14.409		20.8988	8.45199
13.9575		33.2045					Brown-Forsythe test
13.9021							F (DFn, DFd)	0.3417 (5, 45)
							P value	0.8848
							P value summary	ns
							Are SDs significantly different (P < 0.05)?	No
							Bartlett's test
							Bartlett's statistic (corrected)	2.327
							P value	0.8023
							P value summary	ns
							Are SDs significantly different (P < 0.05)?	No
							ANOVA table	SS	DF	MS	F (DFn, DFd)	P value
							Treatment (between columns)	13345	5	2669	F (5, 45) = 44.89	P<0.0001
							Residual (within columns)	2676	45	59.46
							Total	16020	50
							Data summary
							Number of treatments (columns)	6
							Number of values (total)	51
