# Supplementary material for: Inhibition of the proton-activated chloride channel PAC by PIP2
Source: eLife. 2023 Jan 12;12:e83935. doi: 10.7554/eLife.83935 (PMC9876566; doi:10.7554/eLife.83935)
Supplement: Figure 3—figure supplement 1—source data 1. [file elife-83935-fig3-figsupp1-data1.xlsx]

## Sheet: Figure S2 B
WT	K325,29,30>A	K336A	K337A	K335,37,L339>A	Δ340-350
76.7746	90.476	65.4045	55.6683	62.1426	87.7788		Table Analyzed	Inner %
65.1015	68.6868	51.6667	64.1409	50.7066	72.5699		Data sets analyzed	A, B, D-G
53.1271	77.8938	71.4286	37.4387	69.0375	67.9668
71.781					63.4981		ANOVA summary
61.263					85.0642		F	2.433
64.8026					54.0211		P value	0.0726
61.7991							P value summary	ns
							Significant diff. among means (P < 0.05)?	No
							R squared	0.3904
							Brown-Forsythe test
							F (DFn, DFd)	0.3910 (5, 19)
							P value	0.8488
							P value summary	ns
							Are SDs significantly different (P < 0.05)?	No
							Bartlett's test
							Bartlett's statistic (corrected)
							P value
							P value summary
							Are SDs significantly different (P < 0.05)?
							ANOVA table	SS	DF	MS	F (DFn, DFd)	P value
							Treatment (between columns)	1389	5	277.9	F (5, 19) = 2.433	P=0.0726
							Residual (within columns)	2170	19	114.2
							Total	3559	24
							Data summary
							Number of treatments (columns)	6
							Number of values (total)	25

## Sheet: Figure S2 C
-PIP2	+PIP2
153.4	67.33		Table Analyzed	Data 1
82.88	99.94
36.7	56.01		Column B	+PIP2
58.64	125.37		vs.	vs.
199.31	38.5		Column A	-PIP2
126.5
58.28			Unpaired t test
			P value	0.4254
			P value summary	ns
			Significantly different (P < 0.05)?	No
			One- or two-tailed P value?	Two-tailed
			t, df	t=0.8309, df=10
			How big is the difference?
			Mean of column A	102.2
			Mean of column B	77.43
			Difference between means (B - A) ± SEM	-24.81 ± 29.86
			95% confidence interval	-91.36 to 41.73
			R squared (eta squared)	0.06458
			F test to compare variances
			F, DFn, Dfd	2.886, 6, 4
			P value	0.3243
			P value summary	ns
			Significantly different (P < 0.05)?	No
			Data analyzed
			Sample size, column A	7
			Sample size, column B	5

## Sheet: Figure S2 D
+PLL	-PLL			Table Analyzed	Data 2
89.89	50
85	121			Column B	-PLL
76.3	50			vs.	vs.
74	81.83			Column A	+PLL
53.5	57.35
147.462	62.7819			Unpaired t test
223.753	94.4432			P value	0.122
203.77	188.978			P value summary	ns
170.032	104.743			Significantly different (P < 0.05)?	No
154.074	43.4222			One- or two-tailed P value?	Two-tailed
135.033	159.958			t, df	t=1.615, df=20
				How big is the difference?
				Mean of column A	128.4
				Mean of column B	92.23
				Difference between means (B - A) ± SEM	-36.21 ± 22.42
				95% confidence interval	-82.98 to 10.56
				R squared (eta squared)	0.1154
				F test to compare variances
				F, DFn, Dfd	1.396, 10, 10
				P value	0.6075
				P value summary	ns
				Significantly different (P < 0.05)?	No
				Data analyzed
				Sample size, column A	11
				Sample size, column B	11

## Sheet: Figure S2 E
WT pH 5.0	WT+PIP2	R93A pH 5.0	R93A+PIP2	K97A pH 5.0	K97A+PIP2	H98A	H98A+PIP2	K106A	K106A+PIP2	K294A	K294A+PIP2	W304A	W304A+PIP2
368.659	216.624	1212.85	1051.97	1065.8	795	584.451	250.87	273.15	215.411	708.632	531.169	229.386	217.686			Table Analyzed	pA/pF merged WT
552.484	310.1	415.759	303.671	254.387	150.539	430.656	231.951	1263.48	818.379	476.239	408.175	507.925	457.945			Data sets analyzed	A-N
378.943	221.503	514.316	420.401	412.96	180.833	426.181	215.554	533.373	393.493	188.184	168.487	452.636	388.66
719.338	307.5	264.975	224.758	422.288	254.109	466.445	172.495	226.626	182.574	360.1	298.582	683.218	636.567			ANOVA summary
639.266	180.182	305.119	225.309	355.99	215.545	308.173	161.011	248.407	201.242	753.308	633.655	542.8	376.814			F	2.429
736.718	151.563	687.038	490.013	461.043	361.612	801.458	422.325	263.226	200.713	118.534	90.5016	562.079	450.459			P value	0.0066
901.836	397.729			583.294	375.911											P value summary	**
446.926	199.142															Significant diff. among means (P < 0.05)?	Yes
397.859	188.431															R squared	0.2329
416.133	268.529
424.936	204.576															Brown-Forsythe test
782.01	401.827															F (DFn, DFd)	1.008 (13, 104)
463.316	220.445															P value	0.4493
557.413	207.767															P value summary	ns
556.49	280.305															Are SDs significantly different (P < 0.05)?	No
428.986	252.511
255.13	118.569															Bartlett's test
210.73	128.954															Bartlett's statistic (corrected)	42.69
344.475	173.978															P value	<0.0001
219.51	105.449															P value summary	****
358.912	205.332															Are SDs significantly different (P < 0.05)?	Yes
385.007	230.833
																ANOVA table	SS	DF	MS	F (DFn, DFd)	P value
																Treatment (between columns)	1443426	13	111033	F (13, 104) = 2.429	P=0.0066
																Residual (within columns)	4753631	104	45708
																Total	6197057	117
																Data summary
																Number of treatments (columns)	14
																Number of values (total)	118

## Sheet: Figure S2 F
WT	R93A	K97A	H98A	K106A	K294A	W304A		Table Analyzed	Data 1
79.0908	73.0135	81.4273	93.0107	95.6604	91.7388	86.0921		Data sets analyzed	A-G
85.4926	93.2123	85.6169	97.2122	73.6759	90.1875	91.0582
83.705	84.0139	87.1396	96.074	82.9704	93.4027	71.8363		ANOVA summary
91.867	73.9136	82.9209	77.2975	78.0589	91.3099	82.5056		F	1.195
88.0961	86.4377	95.9797	88.7332	78.559	89.1869	79.5977		P value	0.3253
81.5389	85.4058		80.301	93.5025	94.0566	85.3835		P value summary	ns
90.4906	93.5356			87.0984	87.0565	84.5155		Significant diff. among means (P < 0.05)?	No
86.6986	92.309			88.1475		88.4723		R squared	0.1299
81.3361				90.8546
83.9741								Brown-Forsythe test
81.6912								F (DFn, DFd)	1.720 (6, 48)
88.7101								P value	0.1366
								P value summary	ns
								Are SDs significantly different (P < 0.05)?	No
								Bartlett's test
								Bartlett's statistic (corrected)	11.74
								P value	0.0679
								P value summary	ns
								Are SDs significantly different (P < 0.05)?	No
								ANOVA table	SS	DF	MS	F (DFn, DFd)	P value
								Treatment (between columns)	276.4	6	46.07	F (6, 48) = 1.195	P=0.3253
								Residual (within columns)	1851	48	38.57
								Total	2128	54
								Data summary
								Number of treatments (columns)	7
								Number of values (total)	55

## Sheet: Figure S2 G
fPAC	fPAC+PIP2	fPAC_M94R+N98K+Q295K	fPAC_M94R+N98K+Q295K+PIP2			Table Analyzed	pA/pF			Table Analyzed	pA/pF
299.155	220.35	170.62	60.8471
491.873	354.267	156.982	52.5477			Column C	fPAC_M94R+N98K+Q295K			Column D	fPAC_M94R+N98K+Q295K+PIP2
145.317	107.585	266.069	96.918			vs.	vs.			vs.	vs.
136.776	79.8763	228.402	86.0921			Column A	fPAC			Column B	fPAC+PIP2
154.089	119.098	146.298	60.952
242.826	171.309	127.228	63.4468			Unpaired t test				Unpaired t test
		135.131	44.4763			P value	0.2395			P value	0.0166
						P value summary	ns			P value summary	*
						Significantly different (P < 0.05)?	No			Significantly different (P < 0.05)?	Yes
						One- or two-tailed P value?	Two-tailed			One- or two-tailed P value?	Two-tailed
						t, df	t=1.244, df=11			t, df	t=2.822, df=11
						How big is the difference?				How big is the difference?
						Mean of column A	245			Mean of column B	175.4
						Mean of column C	175.8			Mean of column D	66.47
						Difference between means (C - A) ± SEM	-69.19 ± 55.63			Difference between means (D - B) ± SEM	-108.9 ± 38.61
						95% confidence interval	-191.6 to 53.25			95% confidence interval	-193.9 to -23.96
						R squared (eta squared)	0.1233			R squared (eta squared)	0.4199
						F test to compare variances				F test to compare variances
						F, DFn, Dfd	6.957, 5, 6			F, DFn, Dfd	29.65, 5, 6
						P value	0.0351			P value	0.0007
						P value summary	*			P value summary	***
						Significantly different (P < 0.05)?	Yes			Significantly different (P < 0.05)?	Yes
						Data analyzed				Data analyzed
						Sample size, column A	6			Sample size, column B	6
						Sample size, column C	7			Sample size, column D	7
