# Supplementary material for: Inhibition of the proton-activated chloride channel PAC by PIP2
Source: eLife. 2023 Jan 12;12:e83935. doi: 10.7554/eLife.83935 (PMC9876566; doi:10.7554/eLife.83935)
Supplement: Figure 3—source data 1. [file elife-83935-fig3-data1.xlsx]

## Sheet: Figure 3 E 
R93A+PIP2	WT+PIP2	K97A+PIP2	K106A+PIP2	K294A+PIP2	W304A+PIP2	H98A+PIP2
26.9599	41.2401	25.4083	21.1382	25.043	5.10044	57.0759			Table Analyzed	%inhibition
18.2602	43.8717	40.8228	35.2281	14.292	9.84008	46.1402			Data sets analyzed	A-G
15.1777	41.5471	56.2106	26.2256	10.4671	14.134	49.4221
26.1568	57.2523	39.8256	19.4381	17.0837	6.82809	63.0192			ANOVA summary
28.6776	71.8142	39.452	18.9871	15.8837	30.5796	47.7531			F	18.13
13.2645	79.4272	21.5665	23.7486	23.6496	19.8584	47.3054			P value	<0.0001
26.6938	38.8059	35.5538		26.1406	49.2617				P value summary	****
34.0525	49.4946	42.4659		31.9223	32.8033				Significant diff. among means (P < 0.05)?	Yes
48.6224	51.9617	37.4412			43.7233				R squared	0.6188
	55.8979				34.7478
	55.4419								Brown-Forsythe test
	52.6388								F (DFn, DFd)	1.830 (6, 67)
	35.4704								P value	0.1065
	51.8572								P value summary	ns
	48.6161								Are SDs significantly different (P < 0.05)?	No
	52.4202
	62.7266								Bartlett's test
	49.6298								Bartlett's statistic (corrected)	9.092
	41.1377								P value	0.1685
	53.5259								P value summary	ns
	42.7905								Are SDs significantly different (P < 0.05)?	No
	40.0443
	75.3332								ANOVA table	SS	DF	MS	F (DFn, DFd)	P value
	75.8695								Treatment (between columns)	13440	6	2240	F (6, 67) = 18.13	P<0.0001
	48.6234								Residual (within columns)	8279	67	123.6
	56.6615								Total	21718	73
									Data summary
									Number of treatments (columns)	7
									Number of values (total)	74

## Sheet: Figure 3 G
hPAC+PIP2	fPAC+PIP2		Table Analyzed	%inhibition
48.4366	38.142
51.0314	34.573		Column B	fPAC+PIP2
60.2474	28.041		vs.	vs.
44.8854	30.4001		Column A	hPAC+PIP2
42.5666	21.0165
49.9209	43.1756		Unpaired t test
			P value	0.0019
			P value summary	**
			Significantly different (P < 0.05)?	Yes
			One- or two-tailed P value?	Two-tailed
			t, df	t=4.175, df=10
			How big is the difference?
			Mean of column A	49.51
			Mean of column B	32.56
			Difference between means (B - A) ± SEM	-16.96 ± 4.061
			95% confidence interval	-26.01 to -7.908
			R squared (eta squared)	0.6355
			F test to compare variances
			F, DFn, Dfd	1.624, 5, 5
			P value	0.6074
			P value summary	ns
			Significantly different (P < 0.05)?	No
			Data analyzed
			Sample size, column A	6
			Sample size, column B	6

## Sheet: Figure 3 H
fPAC	fPAC_M94R+N98K+Q295K			Table Analyzed	triple mutant
26.7195	64.3376
29.7648	66.5264			Column C	fPAC_M94R+N98K+Q295K
27.3392	63.5741			vs.	vs.
41.5952	62.3068			Column B	fPAC
23.3188	59.1517
30.0264	49.8536			Unpaired t test
	67.695			P value	<0.0001
				P value summary	****
				Significantly different (P < 0.05)?	Yes
				One- or two-tailed P value?	Two-tailed
				t, df	t=9.421, df=11
				How big is the difference?
				Mean of column B	29.79
				Mean of column C	61.92
				Difference between means (C - B) ± SEM	32.13 ± 3.410
				95% confidence interval	24.62 to 39.63
				R squared (eta squared)	0.8897
				F test to compare variances
				F, DFn, Dfd	1.090, 5, 6
				P value	0.9022
				P value summary	ns
				Significantly different (P < 0.05)?	No
				Data analyzed
				Sample size, column B	6
				Sample size, column C	7
