# Supplementary material for: Inhibition of the proton-activated chloride channel PAC by PIP2
Source: eLife. 2023 Jan 12;12:e83935. doi: 10.7554/eLife.83935 (PMC9876566; doi:10.7554/eLife.83935)
Supplement: Figure 4—source data 1. [file elife-83935-fig4-data1.xlsx]

## Sheet: Figure 4 A
5	265.344
10	234.958
15	242.442
20	1612.08
25	1556.18
30	1424.26
35	1360.13
40	1305.39
45	1248.76
50	1216.22
55	1185.94
60	1129.41
65	1093.88
70	1080.02
75	1079.16
80	1020.15
85	348.852
90	305.267
95	249.474
100	232.58
105	203.785
110	208.057
115	177.293
120	174.087
125	161.611
130	160.19
135	152.752
140	149.158
145	144.116
150	150.561
155	146.439
160	146.398
165	140.067
170	145.687
175	143.715
180	146.867
185	146.858

## Sheet: Figure 4 B
5	111.653
10	97.9847
15	94.4063
20	483.906
25	1273.41
30	1311.44
35	1345.43
40	1362.7
45	1325.33
50	1321.22
55	1250.63
60	1279.39
65	1276.62
70	962.865
75	998.416
80	934.449
85	909.573
90	924.441
95	906.996
100	892.727
105	859.429
110	803.767
115	807.528
120	789.893
125	786.694
130	747.763
135	720.18
140	697.685
145	670.659
150	646.995
155	650.901
160	623.84
165	605.224

## Sheet: Figure 4 C
pH 4.0	pH 5.0
74.698	47.7473		Table Analyzed	only 5.0 and 4.0Data 1
85.8783	60.1996		Data sets analyzed	A-D
76.6804	47.8753
87.1933	61.0225		ANOVA summary
88.3976	59.2615		F	28.35
84.2951	51.4016		P value	<0.0001
	58.914		P value summary	****
			Significant diff. among means (P < 0.05)?	Yes
			R squared	0.802
			Brown-Forsythe test
			F (DFn, DFd)	0.9823 (3, 21)
			P value	0.42
			P value summary	ns
			Are SDs significantly different (P < 0.05)?	No
			Bartlett's test
			Bartlett's statistic (corrected)	3.872
			P value	0.2756
			P value summary	ns
			Are SDs significantly different (P < 0.05)?	No
			ANOVA table	SS	DF	MS	F (DFn, DFd)	P value
			Treatment (between columns)	5863	3	1954	F (3, 21) = 28.35	P<0.0001
			Residual (within columns)	1448	21	68.93
			Total	7311	24
			Data summary
			Number of treatments (columns)	4
			Number of values (total)	25

## Sheet: Figure 4 E
5	432.92
10	458.462
15	437.532
20	427.222
25	9144.14
30	9671.25
35	9369.03
40	9110.35
45	8939.45
50	8719.86
55	8610.9
60	8567.77
65	8550.79
70	8130.68
75	7307.76
80	7193.01
85	7171.12
90	7055.98
95	6995.75
100	6806.97
105	6690.18
110	6545.44
115	6354.4
120	6172.74
125	5958.94
130	5821.52
135	5630.92
140	5572.1
145	5429.72
150	5296.6
155	5184.59
160	5048.24
165	4874.1
170	4783.47
175	4599.5
180	4503.59

## Sheet: Figure 4 F
5	351.316
10	244.645
15	152.06
20	61.184
25	9333.53
30	8194.17
35	6669.4
40	5566.52
45	4901.7
50	4543.25
55	4253.02
60	4155.09
65	4026.05
70	4024.64
75	3313.13
80	1043.86
85	601.435
90	402.018
95	283.872
100	360.632
105	259.767
110	268.598
115	180.969
120	336.018
125	351.308
130	417.672
135	408.067
140	333.072
145	438.764
150	399.894
155	367.052
160	320.974
165	385.112
170	371.203
175	349.262
180

## Sheet: Figure 4 G
WT+PIP2	E94R+PIP2			Table Analyzed	%inhibition
45.9956	89.9265
50.4174	85.3415			Column B	E94R+PIP2
50.1456	90.1659			vs.	vs.
49.3838	87.7825			Column A	WT+PIP2
33.98	85.3423
42.6286	86.3582			Unpaired t test
41.845	96.0784			P value	<0.0001
				P value summary	****
				Significantly different (P < 0.05)?	Yes
				One- or two-tailed P value?	Two-tailed
				t, df	t=16.39, df=12
				How big is the difference?
				Mean of column A	44.91
				Mean of column B	88.71
				Difference between means (B - A) ± SEM	43.80 ± 2.672
				95% confidence interval	37.98 to 49.62
				R squared (eta squared)	0.9572
				F test to compare variances
				F, DFn, Dfd	2.449, 6, 6
				P value	0.3
				P value summary	ns
				Significantly different (P < 0.05)?	No
				Data analyzed
				Sample size, column A	7
				Sample size, column B	7
